# Supplementary material for: Soil Metabolome Impacts the Formation of the Eco-corona and Adsorption Processes on Microplastic Surfaces
Source: PubMed Central journal article supplement (PMC10233752; doi:10.1021/acs.est.3c01877), 2023-05-17
Supplement: es3c01877_si_001.pdf [file es3c01877_si_001.pdf]

1 Supporting Information for  
2 *Environmental Science & Technology*

3 **Soil Metabolome Impacts the Formation of the Eco-corona and Adsorption**  
4 **Processes on Microplastic Surfaces**

5 Shi Yao <sup>a,b</sup>, Xiaona Li <sup>c</sup>, Tao Wang <sup>d</sup>, Xin Jiang <sup>a,b</sup>, Yang Song <sup>a,b,\*</sup>, Hans Peter H. Arp <sup>e,f</sup>

6 <sup>a</sup> *CAS Key Laboratory of Soil Environment and Pollution Remediation, Institute of Soil Science,*  
7 *Chinese Academy of Sciences, Nanjing 210008, PR China*

8 <sup>b</sup> *University of Chinese Academy of Sciences, Beijing 100049, PR China*

9 <sup>c</sup> *School of Environmental Science and Engineering, Jiangnan University, Wuxi 225127, PR China*

10 <sup>d</sup> *Institute of Mountain Hazards and Environment, Chinese Academy of Sciences, Chengdu 610299,*  
11 *PR China*

12 <sup>e</sup> *Norwegian Geotechnical Institute (NGI), P.O. Box 3930, Ullevål Stadion, N-0806 Oslo, Norway*

13 <sup>f</sup> *Department of Chemistry, Norwegian University of Science and Technology (NTNU), NO-7491*  
14 *Trondheim, Norway*

15  
16 **Corresponding author: Yang Song**

17 **Yang Song, E-mail: [ysong@issas.ac.cn](mailto:ysong@issas.ac.cn)**

18  
19 **The supporting information contains 51 pages including 5 texts, 16 figures and 8 tables.**

21 **Text S1.**

22 **Non-targeted analysis of the eco-corona.** Chromatographic separation of the  
23 metabolites was performed on an ExionLCTMAD system (AB Sciex, USA) equipped with an  
24 ACQUITY UPLC BEH C18 column (100 mm × 2.1 mm i.d., 1.7 μm; Waters, Milford, USA).  
25 The mobile phases consisted of 0.1% formic acid in water with formic acid (0.1%) (Solvent A)  
26 and 0.1% formic acid in acetonitrile/isopropanol (1/1, v/v) (solvent B). The solvent gradient  
27 changed according to the following conditions: from 0 to 3 min, 95% (A): 5% (B) to 80% (A):  
28 20% (B); from 3 to 9 min, 80% (A): 20% (B) to 5% (A): 95% (B); from 9 to 13 min, 5% (A): 95%  
29 (B) to 5% (A): 95% (B); from 13 to 13.1 min, 5% (A): 95% (B) to 95% (A): 5% (B), from 13.1  
30 to 16 min, 95% (A): 5% (B) to 95% (A): 5% (B) for equilibrating the systems. The sample  
31 injection volume was 20 μL and the flow rate was set to 0.4 mL min<sup>-1</sup>. The column temperature  
32 was maintained at 40 °C. During the period of analysis, all these samples were stored at 4 °C. The  
33 ultra-performance liquid chromatography–tandem mass spectrometry (UPLC-MS/MS) system  
34 was coupled to a quadrupole-time-of-flight mass spectrometer (Triple TOFTM5600+, AB Sciex,  
35 USA) equipped with an electrospray ionization (ESI) source operating in positive mode and  
36 negative mode. The optimal conditions were set as followed: source temperature, 500 °C; curtain  
37 gas (CUR), 30 psi; both Ion Source GS1 and GS2, 50 psi; ion-spray voltage floating (ISVF),  
38 –4000 V in negative mode and 5000 V in positive mode, respectively; decluttering potential, 80  
39 V; a collision energy (CE), 20 – 60 V rolling for MS/MS. Data acquisition was performed with  
40 using the Data Dependent Acquisition (DDA) mode. The detection was carried out over a mass  
41 range of 50 – 1000 m/z. As a part of the system conditioning and quality control process, a pooled  
42 quality control sample (QC) was prepared by mixing equal volumes of all samples. The QC  
43 samples were disposed and tested in the same manner as the analytic samples. This pooled sample,  
44 which represents the whole sample set, would be injected at regular intervals (every 8 samples)  
45 in order to monitor the stability of the analysis.

46 **Text S2.**

47 **The screening principle of soil metabolites were selected for targeted**  
48 **metabolomics.** Certain soil metabolites were selected for targeted metabolomics analysis to  
49 verify direct sorption and to characterize the adsorption kinetics on microplastics during the eco-  
50 corona formation process. The pure compounds used in this experiment were selected according  
51 to the following screening criteria: (i) the standard products of metabolites could be purchased;  
52 (ii) the metabolites have been found to play a role in the metabolic pathway in the database of  
53 Kyoto Encyclopedia of Genes and Genomes Pathway  
54 (<https://www.genome.jp/kegg/pathway.html>); (iii) the compounds appeared in metabolites of  
55 different types of soils and were sorbed by microplastics commonly; and (iv) the detection method  
56 was stable and sensitive.

57 **Text S3.**

58 **Targeted analysis of the eco-corona.** The chromatographic conditions were listed as  
59 follows: ExionLC AD system, Waters T3 column (100 × 2.1 mm, 1.8 μm), column temperature  
60 45 °C, standard injection volume of 10 μL and balance for 2 min before injection. The mobile  
61 phases consisted of 0.1% formic acid in water with formic acid (0.1%) (Solvent A) and 0.1%  
62 formic acid in acetonitrile/isopropanol (1:1, v/v) (solvent B). The solvent gradient changed  
63 according to the following conditions: from 0 to 2 min, 98% (A):2% (B) to 98% (A): 2% (B);  
64 from 2 to 10 min, 98% (A): 2% (B) to 2% (A): 98% (B); from 10 to 14 min, 2% (A): 98% (B) to  
65 2% (A): 98% (B) for equilibrating the systems. Mass spectrometry conditions: positive mode  
66 detection IS, Curtain Gas (CUR) IS 35, Collision Gas (CAD) IS Medium, IonSpray Voltage (IS)  
67 is 5500, temperature is 550, Ion Source Gas1 (GS1) is 50, and Ion Source Gas2 (GS2) is 50.

68 **Text S4.**

69 **Determination and calculation of dibutyl phthalate (DBP) sorption on**  
70 **microplastics.** The concentration of DBP in solution was determined by high-performance  
71 liquid chromatography (HPLC) (Agilent 1260 Infinity □) equipped with an ultraviolet (UV)  
72 detector and a C18 column (4.6 × 250 mm). Methanol/ultra-pure water (9/1, v/v) was used as the  
73 mobile phase. The samples (20 μL) were injected into a C18 separation column at a flow rate of  
74 1 mL min<sup>-1</sup>, column temperature of 35 °C, and UV detection wavelength of 275 nm. The  
75 inhibition ratio, or the adsorption capacity reduction ratio, was calculated as follows: sorption  
76 inhibition ratio =  $(K_{P-ck} - K_{P-eco-corona}) / K_{P-ck}$ , where  $K_p$  is the adsorption coefficient representing  
77 the steady-state concentration (C) ratio of sorbed to dissolved analyte ( $C_{sorbed}/C_{water}$ ),  $K_{P-ck}$  is the  
78 adsorption coefficient of DBP on microplastics in pure water,  $K_{P-eco-corona}$  the adsorption coefficient  
79 of DBP sorption on eco-corona formed microplastics.

80 **Text S5.**

81 **Data analysis.** After UPLC-MS/MS analyses, the raw data were imported into the  
82 Progenesis QI 2.3 (Nonlinear Dynamics, Waters, USA) for peak detection and alignment. The  
83 preprocessing results generated a data matrix that consisted of the retention time (RT), mass-to-  
84 charge ratio (m/z) values, and peak intensity. Metabolic features detected at least 80% in any set  
85 of samples were retained. After filtering, minimum metabolite values were imputed for specific  
86 samples in which the metabolite levels fell below the lower limit of quantitation and each  
87 metabolic feature were normalized by sum. The internal standard was used for data QC  
88 (reproducibility), metabolic features which the relative standard deviation (RSD) of QC > 30%  
89 were discarded. Following normalization procedures and imputation, statistical analysis was  
90 performed on log transformed data to identify significant differences in metabolite levels between  
91 comparable groups. Mass spectra of these metabolic features were identified by using the accurate  
92 mass, MS/MS fragments spectra and isotope ratio difference with searching in reliable  
93 biochemical databases as Human metabolome database (HMDB) (<http://www.hmdb.ca/>) and  
94 Metlin database (<https://metlin.scripps.edu/>). A multivariate statistical analysis was performed  
95 using ropls (Version1.6.2, <http://bioconductor.org/packages/release/bioc/html/ropls.html>)  
96 Principle component analysis using an unsupervised method was applied to obtain an overview  
97 of the metabolic data, general clustering, trends, or outliers were visualized. The metabolite  
98 variables were scaled to unit-variances prior to conducting the principal component analysis  
99 (PCA). Orthogonal partial least squares discriminate analysis (OPLS-DA) was used for statistical  
100 analysis to determine global metabolic changes between comparable groups. All the metabolite  
101 variables were scaled to Pareto scaling prior to conducting the OPLS-DA. The model validity was  
102 evaluated from model parameters  $R^2$  and  $Q^2$ , which provide information for the interpretability  
103 and predictability, respectively, of the model and avoid the risk of over-fitting. Variable  
104 importance in the projection (VIP) were calculated in OPLS-DA model. P values were estimated  
105 with paired Student's t-test on single dimensional statistical analysis. The metabolites with  $VIP >$   
106 1 and  $p \leq 0.05$  were metabolites with significant difference. The three types of soil metabolomes

107 without any microplastics were conducted to a 72 h oscillation as blank control. It was found that  
108 only 6 and 9 compounds showed an increase and decrease trends after oscillation in mollisol soil  
109 metabolomes, 9 and 9 in fluvo-aquic soil, and 4 and 5 in red soil, accounting to only 2.48%, 2.96%,  
110 and 1.49% of the total metabolite numbers, respectively. This indicates that the 72 h experiment  
111 did not significantly change the main metabolite composition in the absence of microorganisms  
112 and microplastics, and that the analysis of the effect of microplastics on soil metabolomes via  
113 non-targeted methods is reliable.

**Table S1.** Physico-chemical properties of soils.

|                     | pH   | OM<br>(g kg <sup>-1</sup> ) | DOC<br>(mg kg <sup>-1</sup> ) | TN<br>(g kg <sup>-1</sup> ) | TP<br>(g kg <sup>-1</sup> ) | TK<br>(g kg <sup>-1</sup> ) | CEC<br>(cmol kg <sup>-1</sup> ) | ES<br>(mg kg <sup>-1</sup> ) | Sand<br>(%) | Silt<br>(%) | Clay<br>(%) | Microplastics<br>(%) |
|---------------------|------|-----------------------------|-------------------------------|-----------------------------|-----------------------------|-----------------------------|---------------------------------|------------------------------|-------------|-------------|-------------|----------------------|
| Mollisol<br>soil    | 5.25 | 44.82                       | 115.91                        | 2.23                        | 1.08                        | 16.30                       | 25.33                           | 9.80                         | 6.68        | 65.88       | 27.44       | 0.002%               |
| Fluvo-aquic<br>soil | 8.52 | 9.67                        | 47.73                         | 0.61                        | 0.72                        | 16.81                       | 8.34                            | 15.90                        | 65.78       | 27.69       | 6.53        | 0.0005%              |
| Red soil            | 4.64 | 13.40                       | 85.23                         | 0.73                        | 0.55                        | 12.48                       | 17.69                           | 31.95                        | 27.60       | 36.44       | 35.96       | 0.0006%              |

Note: OM: organic matter; DOC: dissolved organic carbon; CEC: cation exchange capacity; TN: total nitrogen; TP: total phosphorus; TK: total potassium; ES: effective sulfur.



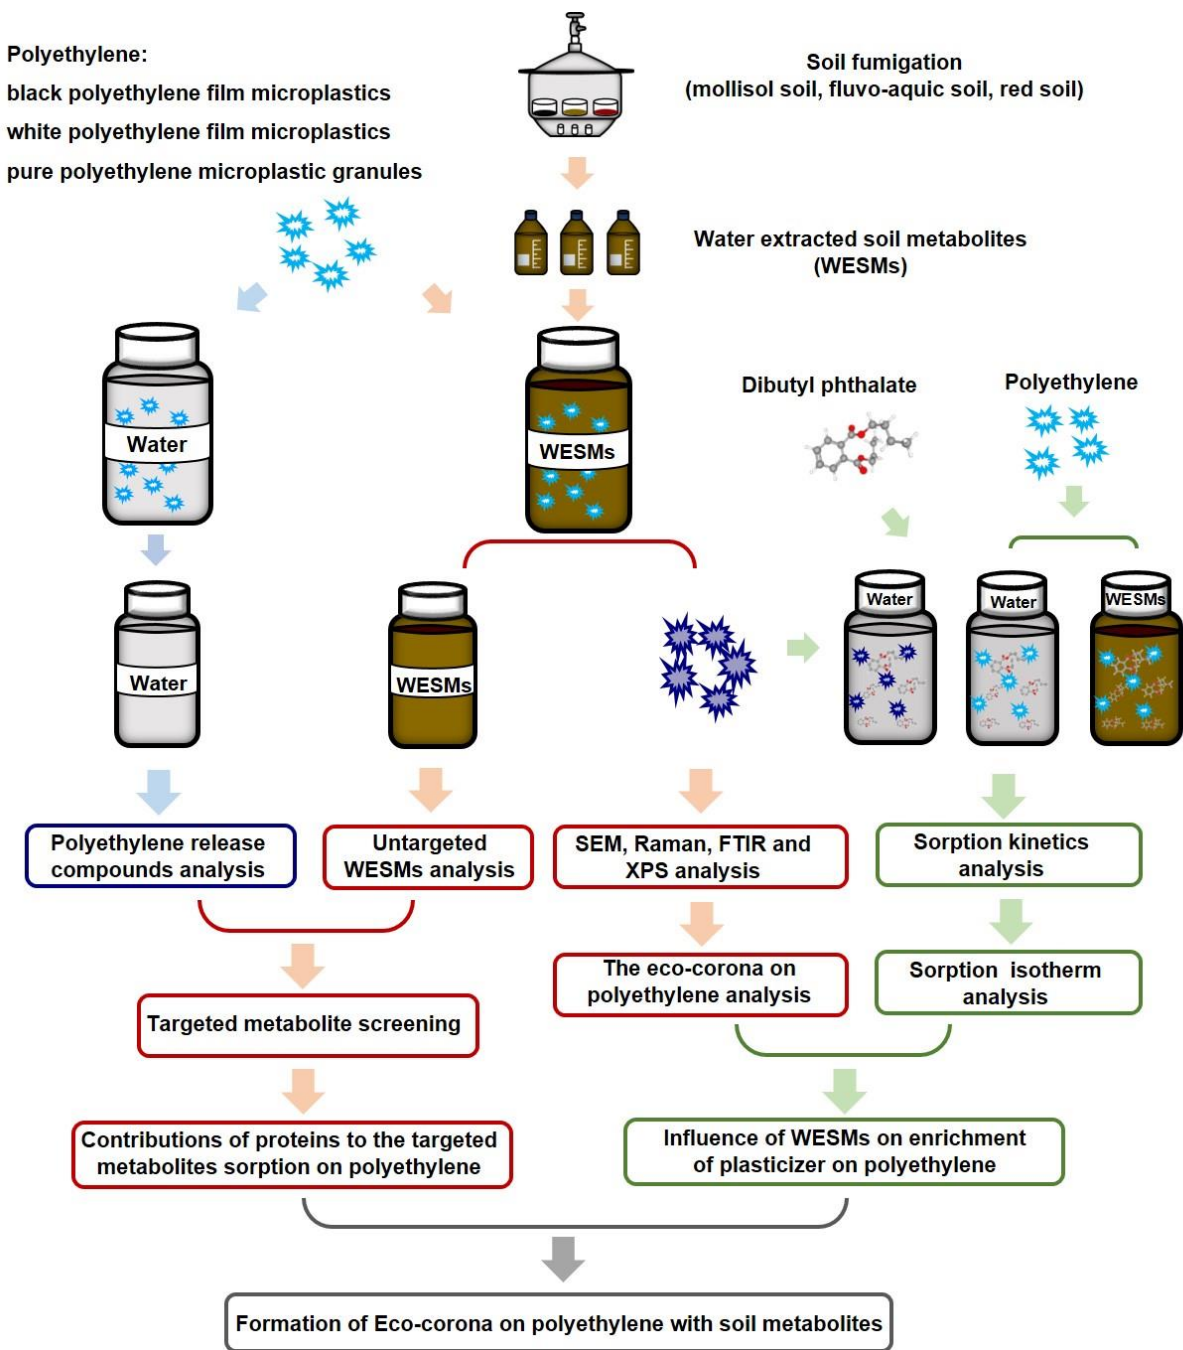

116

117 **Figure S1.** The experimental procedures of this study.

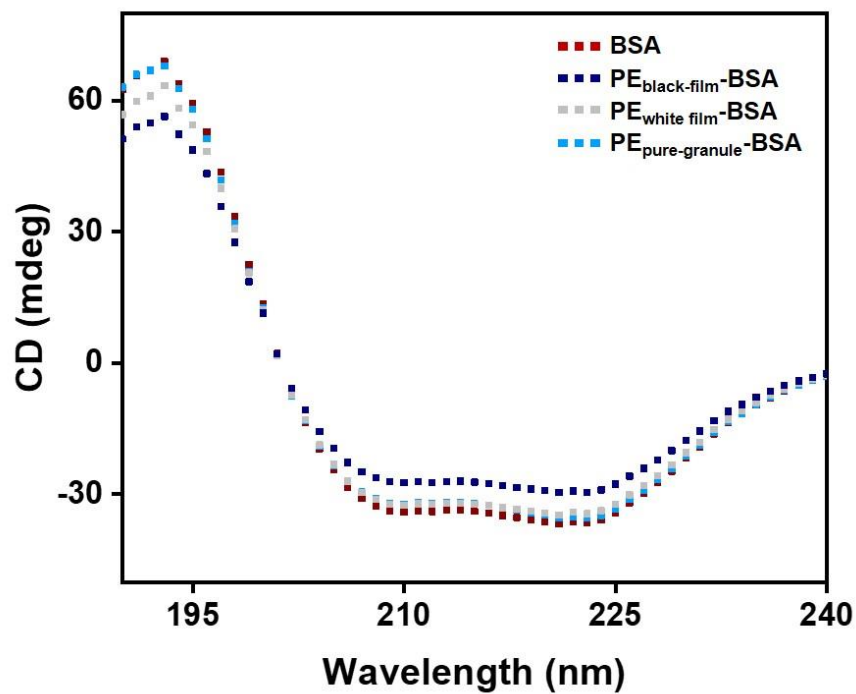

118

119 **Figure S2.** Circular dichroism (CD) spectra of the interaction between bovine serum albumin  
 120 (BSA) and microplastics. PE<sub>black-film</sub>: black polyethylene film microplastics; PE<sub>white-film</sub>: white  
 121 polyethylene film microplastics; PE<sub>pure-granule</sub>: pure polyethylene microplastic granules. The protein  
 122 structure did not change after exposure to microplastics.

**Table S2.** Kinetics models and isotherm models, equations and parameters for dibutyl phthalate sorption on microplastics.

|                                                                                                | Models              | Equations                                     |
|------------------------------------------------------------------------------------------------|---------------------|-----------------------------------------------|
| Kinetics                                                                                       | Pesudo-first-order  | $Q_t = Q_e(1 - \exp(-k_1 t))$                 |
|                                                                                                | Pesudo-second-order | $Q_t = (k_2 Q_e^2 t) / (1 + k_2 Q_e t)$       |
| Isotherm                                                                                       | Linear              | $Q_e = K_d C_e$                               |
|                                                                                                | Freundlich          | $Q_e = K_F C_e^{1/n}$                         |
| Equilibrium partition ratio between DBP concentration in microplastics and background solution |                     | $K_p = C_{sorbed} / C_{background\ solution}$ |

Note:  $Q_t$  and  $Q_e$  are the sorption amount at time  $t$  and sorption equilibrium respectively ( $\text{mg kg}^{-1}$ );  $t$  is the sorption time (min);  $k_1$  and  $k_2$  are pseudo-first-order and pseudo-second-order rate constants, respectively, and the units are ( $\text{min}^{-1}$ ) and ( $\text{kg mg}^{-1} \text{min}^{-1}$ ), respectively.  $K_d$  and  $K_F$  are the Linear and Freundlich constant ( $\text{L mg}^{-1}$ ), respectively;  $1/n$  is the sorption affinity constant;  $K_p$  is partition coefficient.

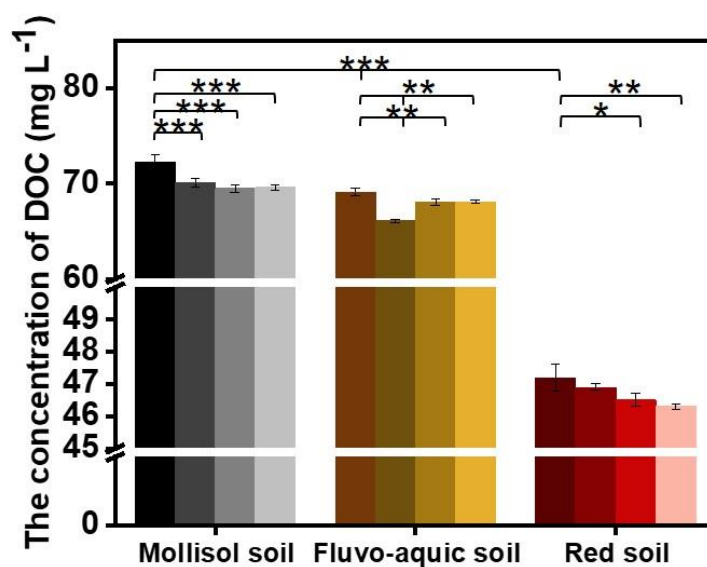

125  
 126 **Figure S3.** The concentration of dissolved organic matter (DOC) in different solutions of water  
 127 extracted soil metabolites interacted with or without microplastics. The color depth of each group  
 128 was in order of blank control, black polyethylene film microplastics, white polyethylene film  
 129 microplastics and pure polyethylene microplastic granules sorption treatments. (\*\* $p \leq 0.001$ , \*\* $p$   
 130  $\leq 0.01$ , \* $p \leq 0.05$ ).

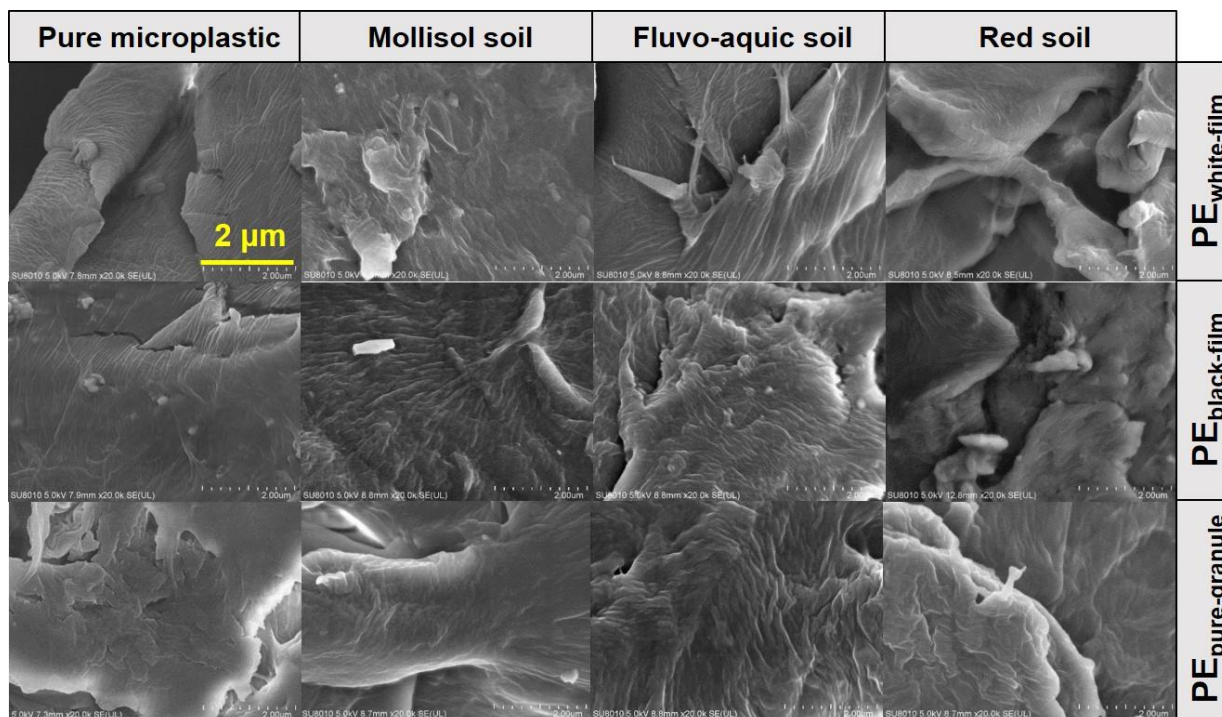

131  
 132 **Figure S4.** The scanning electron microscopy images of microplastics after interacting with water  
 133 extracted soil metabolites from different soils or without (Pure microplastic). PE<sub>black-film</sub>: black  
 134 polyethylene film microplastics; PE<sub>white-film</sub>: white polyethylene film microplastics; PE<sub>pure-granule</sub>:  
 135 pure polyethylene microplastic granules.

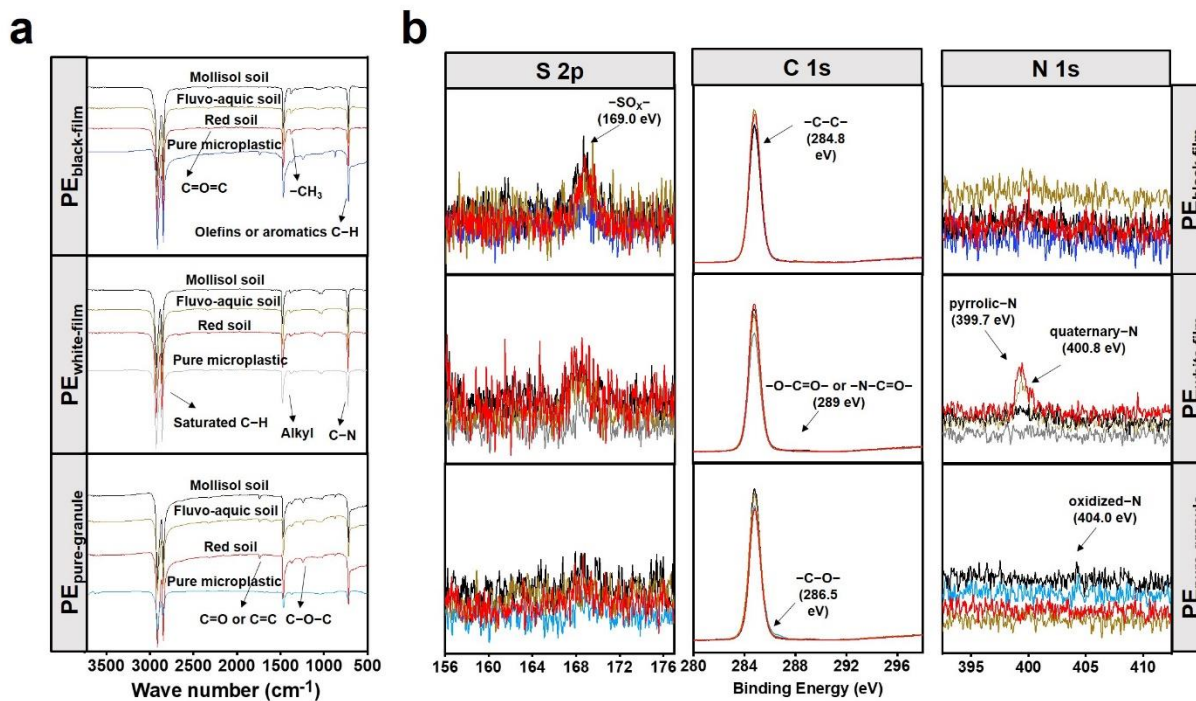

136  
 137 **Figure S5.** The fourier transform infrared spectroscopy (a) and X ray photoelectron spectroscopy  
 138 (b) analysis of the coating of microplastic particles interacted with water extracted soil metabolites  
 139 from different soils or without (Pure microplastic). PE<sub>black-film</sub>: black polyethylene film  
 140 microplastics; PE<sub>white-film</sub>: white polyethylene film microplastics; PE<sub>pure-granule</sub>: pure polyethylene  
 141 microplastic granules.

**Table S3.** All identifiable soil metabolites.

| Metabolite                                      | Library ID                | Mode | Formula    | HMDB Superclass                  |
|-------------------------------------------------|---------------------------|------|------------|----------------------------------|
| Allysine                                        | HMDB0001263               | pos  | C6H11NO3   | Organic acids and derivatives    |
| C9:2n-2,4                                       | LMFA01030450              | pos  | C9H14O2    | -                                |
| Pisumionoside                                   | HMDB0039947               | pos  | C19H32O9   | Lipids and lipid-like molecules  |
| N6-Acetyl-5S-hydroxy-L-lysine                   | HMDB0033891               | pos  | C8H16N2O4  | Organic acids and derivatives    |
| Glu-Val                                         | -                         | pos  | C10H18N2O5 | -                                |
| Sarmentosin                                     | HMDB0030697               | pos  | C11H17NO7  | Lipids and lipid-like molecules  |
| Hypoxanthine                                    | HMDB0000157               | pos  | C5H4N4O    | Organoheterocyclic compounds     |
| 3-Isopropylcatechol                             | -                         | pos  | C9H12O2    | -                                |
| 2,6,10,10-Tetramethyl-1-oxaspiro[4.5]decan-6-ol | HMDB0037907               | pos  | C13H24O2   | Organoheterocyclic compounds     |
| Cis-5-dodecenoic acid                           | -                         | pos  | C12H22O2   | -                                |
| Propyl 2,4-decadienoate                         | HMDB0037307;LMFA07011001  | pos  | C13H22O2   | Lipids and lipid-like molecules  |
| Monic acid                                      | HMDB0061154               | pos  | C18H30O6   | Lipids and lipid-like molecules  |
| Mangiferic acid                                 | HMDB0029800               | pos  | C18H32O2   | Lipids and lipid-like molecules  |
| 3,6,7-Trihydroxy-4'-methoxyflavone 7-rhamnoside | LMPK12111586;HMD B0041455 | pos  | C22H22O10  | Phenylpropanoids and polyketides |
| Sucrose                                         | HMDB0000258               | pos  | C12H22O11  | Organic oxygen compounds         |
| 2-Hydroxycinnamic acid                          | HMDB0002641               | pos  | C9H8O3     | Phenylpropanoids and polyketides |
| 4-Guanidinobutanoic acid                        | HMDB0003464               | pos  | C5H11N3O2  | Organic acids and derivatives    |
| (-)-erythro-Anethole glycol 1-glucoside         | HMDB0033066               | pos  | C16H24O8   | Organic oxygen compounds         |
| Cibacic acid                                    | HMDB0038580;LMFA02000289  | pos  | C18H28O5   | Lipids and lipid-like molecules  |
| [6]-Gingerdiol 3-acetate                        | HMDB0040566               | pos  | C19H30O5   | Lipids and lipid-like molecules  |
| N-stearoyl valine                               | LMFA08020122              | pos  | C23H45NO3  | -                                |
| Bis(2-ethylhexyl) phthalate                     | -                         | pos  | C24H38O4   | -                                |
| Farnesyl acetone                                | -                         | pos  | C18H30O    | -                                |
| 4-Isopropyl-3-cyclohexene-1-carboxylic acid     | HMDB0037175               | pos  | C10H16O2   | Lipids and lipid-like molecules  |
| Sorbitan laurate                                | LMFA07011017;HMD B0029885 | pos  | C18H34O6   | Lipids and lipid-like molecules  |
| DDA                                             | -                         | pos  | C10H16O    | -                                |
| Isopropyl apiosylglucoside                      | HMDB0041513               | pos  | C14H26O10  | Organic oxygen compounds         |
| Heptaethylene glycol                            | HMDB0061835               | pos  | C14H30O8   | Organic oxygen compounds         |

|                                                                   |                              |     |             |                                  |
|-------------------------------------------------------------------|------------------------------|-----|-------------|----------------------------------|
| Octaethylene glycol                                               | HMDB0094680                  | pos | C16H34O9    | Organic oxygen compounds         |
| Genipinic acid                                                    | HMDB0038126                  | pos | C11H14O6    | Organic acids and derivatives    |
| Aloesol                                                           | HMDB0035712                  | pos | C13H14O4    | Organoheterocyclic compounds     |
| Betaine                                                           | HMDB0000043                  | pos | C5H11NO2    | Organic acids and derivatives    |
| 3-(4-Isopropylphenyl)propanal                                     | HMDB0036171                  | pos | C12H16O     | Lipids and lipid-like molecules  |
| 1-Kestose                                                         | HMDB0011729                  | pos | C18H32O16   | Organic oxygen compounds         |
| L-Glutamic acid                                                   | HMDB0000148                  | pos | C5H9NO4     | Organic acids and derivatives    |
| 1-[2-(2H-1,3-benzodioxol-5-yl)-1-benzofuran-5-yl]propane-1,3-diol | HMDB0131335                  | pos | C18H16O5    | -                                |
| Aminohydroquinone                                                 | -                            | pos | C6H7NO2     | -                                |
| Methionyl-Proline                                                 | HMDB0028981                  | pos | C10H18N2O3S | Organic acids and derivatives    |
| N-(1-Deoxy-1-fructosyl)leucine                                    | HMDB0037840                  | pos | C12H23NO7   | Organic acids and derivatives    |
| Pantothenic Acid                                                  | HMDB0000210                  | pos | C9H17NO5    | Organooxygen compounds           |
| M-Cresol                                                          | HMDB0002048                  | pos | C7H8O       | Benzenoids                       |
| Marmeline                                                         | HMDB0030192                  | pos | C22H25NO3   | Benzenoids                       |
| L-3-Cyanoalanine                                                  | HMDB0060245                  | pos | C4H6N2O2    | Organic acids and derivatives    |
| 1-ACETYLPIPERIDINE                                                | -                            | pos | C7H13NO     | -                                |
| Chenodeoxycholic acid sulfate                                     | LMST05020026;HMD<br>B0002522 | pos | C24H40O7S   | Lipids and lipid-like molecules  |
| PC(16:0/0:0)[U]                                                   | -                            | pos | C24H50NO7P  | -                                |
| Alpha-Bisabolol oxide C                                           | HMDB0038138                  | pos | C15H26O2    | Organoheterocyclic compounds     |
| 4-Formylsalicylic acid                                            | -                            | pos | C8H6O4      | -                                |
| TG(16:1(9Z)/18:0/18:2(9Z,12Z))                                    | HMDB0005425                  | pos | C55H100O6   | Lipids and lipid-like molecules  |
| TG(16:1(9Z)/18:0/18:1(9Z))                                        | HMDB0005423                  | pos | C55H102O6   | Lipids and lipid-like molecules  |
| TG(18:0/18:1(9Z)/18:2(9Z,12Z))                                    | HMDB0005405                  | pos | C57H104O6   | Lipids and lipid-like molecules  |
| TG(i-15:0/a-17:0/i-18:0)[rac]                                     | HMDB0102236                  | pos | C53H102O6   | Lipids and lipid-like molecules  |
| 6-Methoxymellein                                                  | HMDB0038510                  | pos | C11H12O4    | Organoheterocyclic compounds     |
| Geranylcitronellol                                                | HMDB0032147                  | pos | C20H36O     | Lipids and lipid-like molecules  |
| Docosatrienoic acid                                               | HMDB0002823                  | pos | C22H38O2    | Lipids and lipid-like molecules  |
| Riboflavin (Vitamin B2)                                           | -                            | pos | C17H20N4O6  | -                                |
| 3-(4-hydroxyphenyl)-N-(4-oxobutyl)prop-2-enimidic acid            | HMDB0139876                  | pos | C13H15NO3   | Phenylpropanoids and polyketides |
| Cis-2-Carboxycyclohexyl-acetic acid                               | -                            | pos | C9H14O4     | -                                |
| Cinnamic acid                                                     | HMDB0000567                  | pos | C9H8O2      | Phenylpropanoids and polyketides |
| Thymine                                                           | HMDB0000262                  | pos | C5H6N2O2    | Organoheterocyclic compounds     |
| 3,4-Methylenesebacic acid                                         | HMDB0059729                  | pos | C12H18O4    | Lipids and lipid-like molecules  |



|                                                    |                                        |     |              |                                 |
|----------------------------------------------------|----------------------------------------|-----|--------------|---------------------------------|
| D-Pantethine                                       | HMDB0003828                            | pos | C22H42N4O8S2 | Organic acids and derivatives   |
| 5-Hydroxyindoleacetic acid                         | HMDB0000763                            | pos | C10H9NO3     | Organoheterocyclic compounds    |
| 5-Methoxy-DL-tryptophan                            | -                                      | pos | C12H14N2O3   | -                               |
| 2,3-Butanediol glucoside                           | HMDB0040822                            | pos | C10H20O7     | Organic oxygen compounds        |
| Anthranilic acid                                   | -                                      | pos | C7H7NO2      | -                               |
| Helenalin                                          | -                                      | pos | C15H18O4     | -                               |
| N-Acetyl-DL-tryptophan                             | -                                      | pos | C13H14N2O3   | -                               |
| L-Homotyrosine                                     | -                                      | pos | C10H13NO3    | -                               |
| 8,8-Diethoxy-2,6-dimethyl-2-octanol                | HMDB0034557                            | pos | C14H30O3     | Organic oxygen compounds        |
| N-Acetylmuramate                                   | HMDB0060493                            | pos | C11H19NO8    | Organic oxygen compounds        |
| PPOH                                               | -                                      | pos | C15H18O3     | -                               |
| 13-amino-tridecanoic acid                          | LMFA01100006                           | pos | C13H27NO2    | -                               |
| Crispolide                                         | HMDB0036695                            | pos | C15H20O5     | Lipids and lipid-like molecules |
| Melicopicine                                       | -                                      | pos | C18H19NO5    | -                               |
| Procurcumadiol                                     | HMDB0034721                            | pos | C15H22O3     | Lipids and lipid-like molecules |
| Tanacetin                                          | HMDB0035715                            | pos | C15H20O4     | Lipids and lipid-like molecules |
| (R)-11,12,13-Trinor-1(5),6,9-guaiatrien-8-one      | HMDB0039153                            | pos | C12H14O      | Hydrocarbon derivatives         |
| Preisocalamendiol                                  | HMDB0035391                            | pos | C15H24O      | Lipids and lipid-like molecules |
| Valerenolic acid                                   | HMDB0036563                            | pos | C15H22O3     | Lipids and lipid-like molecules |
| Nigelllic acid                                     | HMDB0036094                            | pos | C15H20O5     | Lipids and lipid-like molecules |
| Cuminaldehyde                                      | HMDB0002214                            | pos | C10H12O      | Lipids and lipid-like molecules |
| 9Z,13-Tetradecadien-11-ynal                        | LMFA06000180                           | pos | C14H20O      | -                               |
| Caryophyllene epoxide                              | -                                      | pos | C15H24O      | -                               |
| Alpha-Carissanol                                   | HMDB0035597                            | pos | C15H24O3     | Lipids and lipid-like molecules |
| (3S,5R,6R,7E)-3,5,6-Trihydroxy-7-megastigmen-9-one | HMDB0038736                            | pos | C13H22O4     | -                               |
| 6,8,10,12-pentadecatetraenal                       | LMFA06000087                           | pos | C15H22O      | -                               |
| 12S-HHT                                            | HMDB0012535                            | pos | C17H28O3     | Lipids and lipid-like molecules |
| 9,12,13-TriHOME                                    | HMDB0004708;LMFA02000014               | pos | C18H34O5     | Lipids and lipid-like molecules |
| Longicamphenylone                                  | -                                      | pos | C14H22O      | -                               |
| Thromboxane B3                                     | LMFA03030006;HMD B0005099;LMFA03030016 | pos | C20H32O6     | Lipids and lipid-like molecules |
| METOLACHLOR                                        | -                                      | pos | C15H22ClNO2  | -                               |
| Glycylprolylhydroxyproline                         | HMDB0002171                            | pos | C12H19N3O5   | Organic acids and derivatives   |

|                                                                                  |              |     |            |                                         |
|----------------------------------------------------------------------------------|--------------|-----|------------|-----------------------------------------|
| 6-[5]-ladderane-1-hexanol                                                        | LMFA05000063 | pos | C18H28O    | -                                       |
| N,N-dimethyl-Safingol                                                            | LMSP01080056 | pos | C20H43NO2  | -                                       |
| 9-hydroxy-10-oxo-12(Z)-octadecenoic acid                                         | -            | pos | C18H32O4   | -                                       |
| 2-(5,8-Tetradecadienyl)cyclobutanone                                             | HMDB0037519  | pos | C18H30O    | Organooxygen compounds                  |
| 18alpha-Hydroxyglycyrrhetic acid                                                 | HMDB0040499  | pos | C30H46O5   | Lipids and lipid-like molecules         |
| Phenylacetaldehyde                                                               | HMDB0006236  | pos | C8H8O      | Benzenoids                              |
| 10-Oxo-11-octadecen-13-olide                                                     | HMDB0029786  | pos | C18H30O3   | Phenylpropanoids and polyketides        |
| 4-Hydroxybenzaldehyde                                                            | HMDB0011718  | pos | C7H6O2     | Organic oxygen compounds                |
| L-Isoleucine                                                                     | HMDB0000172  | pos | C6H13NO2   | Organic acids and derivatives           |
| Guanine                                                                          | HMDB0000132  | pos | C5H5N5O    | Organoheterocyclic compounds            |
| N-Acetylmannosamine                                                              | HMDB0001129  | pos | C8H15NO6   | Organic oxygen compounds                |
| N-(6-aminohexanoyl)-6-aminohexanoic acid                                         | LMFA00000009 | pos | C12H24N2O3 | -                                       |
| 2-{3-[(3,3-dimethyloxiran-2-yl)methyl]-4,6-dihydroxy-2-methoxyphenyl}acetic acid | HMDB0125462  | pos | C14H18O6   | Benzenoids                              |
| Isopropyl beta-D-glucoside                                                       | HMDB0032705  | pos | C9H18O6    | Organic oxygen compounds                |
| 5-Aminopentanamide                                                               | HMDB0012176  | pos | C5H12N2O   | Organic acids and derivatives           |
| 5,7-Megastigmadien-9-ol glucoside                                                | HMDB0041044  | pos | C19H32O6   | Lipids and lipid-like molecules         |
| 2-Acetyl-1,5,6,7-tetrahydro-6-hydroxy-7-(hydroxymethyl)-4H-azepine-4-one         | HMDB0035177  | pos | C9H13NO4   | Organoheterocyclic compounds            |
| 2-(14,15-Epoxyeicosatrienoyl) Glycerol                                           | HMDB0013651  | pos | C23H38O5   | Lipids and lipid-like molecules         |
| Glutaminyllarginine                                                              | HMDB0028791  | pos | C11H22N6O4 | Organic acids and derivatives           |
| Triacanthine                                                                     | -            | pos | C10H13N5   | -                                       |
| Quinceoxepine                                                                    | HMDB0038107  | pos | C12H18O    | Organooxygen compounds                  |
| INDOLE-3-CARBINOL                                                                | HMDB0005785  | pos | C9H9NO     | Organoheterocyclic compounds            |
| Galactosylhydroxylysine                                                          | HMDB0000600  | pos | C12H24N2O8 | Organic acids and derivatives           |
| (-)-Ibuprofen                                                                    | -            | pos | C13H18O2   | -                                       |
| 2-AI                                                                             | -            | pos | C9H11N     | -                                       |
| Brefeldin A                                                                      | -            | pos | C16H24O4   | -                                       |
| 3b-Hydroxy-6b-methoxy-7(11)-eremophilin-12,8a-olide                              | HMDB0040755  | pos | C16H24O4   | Lipids and lipid-like molecules         |
| 2-hydroxyphenylpropionylglycine                                                  | HMDB0094723  | pos | C11H13NO4  | Organic acids and derivatives           |
| 1,N2-propanodeoxyguanosine                                                       | HMDB0059780  | pos | C13H17N5O4 | Nucleosides, nucleotides, and analogues |
| C12:5n-1,3,5,7,9                                                                 | LMFA01030243 | pos | C12H14O2   | -                                       |
| MG(15:0/0:0/0:0)                                                                 | HMDB0011563  | pos | C18H36O4   | Lipids and lipid-like molecules         |
| 6-Hydroxyhexadecanoic acid                                                       | HMDB0112192  | pos | C16H32O3   | Lipids and lipid-like molecules         |

|                                                        |                              |     |            |                                  |
|--------------------------------------------------------|------------------------------|-----|------------|----------------------------------|
| Phenylalanyl-Arginine                                  | HMDB0028989                  | pos | C15H23N5O3 | Organic acids and derivatives    |
| 3-Hydroxy-beta-ionone                                  | HMDB0036821                  | pos | C13H20O2   | Lipids and lipid-like molecules  |
| Cinnamyl formate                                       | HMDB0040577                  | pos | C10H10O2   | Benzenoids                       |
| (+)-Abscisic Acid                                      | -                            | pos | C15H20O4   | -                                |
| Hydroxyibuprofen                                       | -                            | pos | C13H18O3   | -                                |
| Citreoviridin C                                        | HMDB0030523                  | pos | C23H30O6   | Organoheterocyclic compounds     |
| 19-Nor-5-androstenediol                                | HMDB0004590;LMST<br>02010050 | pos | C18H28O2   | Lipids and lipid-like molecules  |
| 4,11,13,15-Tetrahydroridentin B                        | HMDB0036150                  | pos | C15H24O4   | Lipids and lipid-like molecules  |
| Mono-(2-ethyl-5-oxohexyl) phthalate                    | HMDB0094645                  | pos | C16H20O5   | Benzenoids                       |
| Chavicol                                               | HMDB0034107                  | pos | C9H10O     | Benzenoids                       |
| 2,3-Dinor-TXB2                                         | LMFA03030003;HMD<br>B0002904 | pos | C18H30O6   | Lipids and lipid-like molecules  |
| (3beta,6beta)-Furanoeremophilane-3,6-diol<br>6-acetate | HMDB0034930                  | pos | C17H24O4   | Lipids and lipid-like molecules  |
| Pentadecanoic acid                                     | LMFA01010015;HMD<br>B0000826 | pos | C15H30O2   | Lipids and lipid-like molecules  |
| 8-Deoxy-11-hydroxy-13-chlorogrosheimin                 | HMDB0041037                  | pos | C15H19ClO4 | Lipids and lipid-like molecules  |
| 5-Phenyl-1-pentanol                                    | HMDB0031624                  | pos | C11H16O    | Lipids and lipid-like molecules  |
| 2,5-Dimethylbenzaldehyde                               | -                            | pos | C9H10O     | -                                |
| 8-Oxohexadecanoic acid                                 | HMDB0030972                  | pos | C16H30O3   | Lipids and lipid-like molecules  |
| Sphingosine                                            | LMSP01010001;HMD<br>B0000252 | pos | C18H37NO2  | Organic nitrogen compounds       |
| Nonadecanoic acid                                      | LMFA01010019;HMD<br>B0000772 | pos | C19H38O2   | Lipids and lipid-like molecules  |
| 2-Hydroxy-2,6,6-trimethylcyclohexanone                 | HMDB0037023                  | pos | C9H16O2    | Organic oxygen compounds         |
| 12-Oxo-20-carboxy-leukotriene B4                       | HMDB0012550;LMFA<br>03020047 | pos | C20H28O6   | Lipids and lipid-like molecules  |
| 5-Hexyl-2-furanhexanoic acid                           | HMDB0112088                  | pos | C16H26O3   | Lipids and lipid-like molecules  |
| Palmitoleoyl Ethanolamide                              | HMDB0013648                  | pos | C18H35NO2  | Organic nitrogen compounds       |
| Glyceryl 5-hydroxydecanoate                            | HMDB0032297                  | pos | C13H26O5   | Lipids and lipid-like molecules  |
| (2xi,3xi,6E)-3,7-Dimethyl-6-octene-1,2,3,8-<br>tetrol  | HMDB0033642                  | pos | C10H20O4   | Lipids and lipid-like molecules  |
| Cerebronic acid                                        | HMDB0039540                  | pos | C24H48O3   | Lipids and lipid-like molecules  |
| 3-Hydroxy-4-phenylbutan-2-one                          | HMDB0032336                  | pos | C10H12O2   | Benzenoids                       |
| Hericene B                                             | HMDB0041180                  | pos | C37H58O5   | Lipids and lipid-like molecules  |
| 1-Undecanol                                            | HMDB0013113                  | pos | C11H24O    | Lipids and lipid-like molecules  |
| N1,N5,N10-Tris-trans-p-                                | HMDB0039962                  | pos | C37H44N4O6 | Phenylpropanoids and polyketides |

|                                                                |                               |     |             |                                  |  |
|----------------------------------------------------------------|-------------------------------|-----|-------------|----------------------------------|--|
| coumaroylspermine                                              |                               |     |             |                                  |  |
| Palmitic amide                                                 | HMDB0012273                   | pos | C16H33NO    | Lipids and lipid-like molecules  |  |
| D6-Ambrettolide                                                | HMDB0037805                   | pos | C16H28O2    | Phenylpropanoids and polyketides |  |
| Stearoylethanolamide                                           | HMDB0013078                   | pos | C20H41NO2   | Organic nitrogen compounds       |  |
| Ganoderic acid beta                                            | HMDB0033234                   | pos | C30H44O6    | Lipids and lipid-like molecules  |  |
| N,N,N-trimethyl-sphingosine                                    | LMSP01080057                  | pos | C21H43NO2   | -                                |  |
| 2-Heptadecylfuran                                              | HMDB0033608                   | pos | C21H38O     | Organoheterocyclic compounds     |  |
| Oleragenoside                                                  | HMDB0036943                   | pos | C42H64O16   | Lipids and lipid-like molecules  |  |
| Aniline                                                        | HMDB0003012                   | pos | C6H7N       | Benzenoids                       |  |
| Dimethylethanolamine                                           | HMDB0032231                   | pos | C4H11NO     | Organonitrogen compounds         |  |
| N-Desmethyldiltiazem                                           | HMDB0061023                   | pos | C21H24N2O4S | Organoheterocyclic compounds     |  |
| Triphenyl phosphate                                            | -                             | pos | C18H15O4P   | -                                |  |
| DG(11D3/13D5/0:0)                                              | HMDB0116373                   | pos | C47H80O7    | Lipids and lipid-like molecules  |  |
| All-trans-Retinoic acid                                        | HMDB0001852                   | pos | C20H28O2    | Lipids and lipid-like molecules  |  |
| Deacetylnomilin                                                | HMDB0035684                   | pos | C26H32O8    | Lipids and lipid-like molecules  |  |
| 1-Phenylheptane                                                | HMDB0061825                   | pos | C13H20      | Benzenoids                       |  |
| Austalide J                                                    | HMDB0030156                   | pos | C25H32O7    | Organoheterocyclic compounds     |  |
| PG(20:4(5Z,8Z,11Z,14Z)/0:0)                                    | LMGP04050010                  | pos | C26H45O9P   | -                                |  |
| Octadecanol                                                    | LMFA05000085;HMD<br>B0002350  | pos | C18H38O     | Lipids and lipid-like molecules  |  |
| Vulgarone A                                                    | HMDB0036733                   | pos | C15H22O     | Lipids and lipid-like molecules  |  |
| Germacrenone                                                   | HMDB0035887                   | pos | C15H26O2    | Lipids and lipid-like molecules  |  |
| Sphinganine                                                    | HMDB0000269;LMSP<br>01020001  | pos | C18H39NO2   | Organic nitrogen compounds       |  |
| 2,4,12-Octadecatrienoic acid isobutylamide                     | HMDB0032033                   | pos | C22H39NO    | Lipids and lipid-like molecules  |  |
| 4,5-Dihydrovomifoliol                                          | HMDB0040615                   | pos | C13H22O3    | Lipids and lipid-like molecules  |  |
| Diisobutyl adipate                                             | LMFA07010834;HMD<br>B0041618  | pos | C14H26O4    | Lipids and lipid-like molecules  |  |
| Muzanzagenin                                                   | HMDB0032601                   | pos | C27H38O5    | Lipids and lipid-like molecules  |  |
| Propylene glycol mono- and diesters of fats<br>and fatty acids | LMFA07011007;HMD<br>B0032494  | pos | C32H62O4    | Lipids and lipid-like molecules  |  |
| Palmitoyl Ethanolamide                                         | LMFA08040057;LMFA<br>08040013 | pos | C18H37NO2   | -                                |  |
| Phytosphingosine                                               | HMDB0004610;LMSP<br>01030001  | pos | C18H39NO3   | Organic nitrogen compounds       |  |
| 3-Methyl-5-propyl-2-furanundecanoic acid                       | HMDB0061646                   | pos | C19H32O3    | Lipids and lipid-like molecules  |  |
| Ankorine                                                       | -                             | pos | C19H29NO4   | -                                |  |

|                                                   |                              |     |             |                                  |
|---------------------------------------------------|------------------------------|-----|-------------|----------------------------------|
| Tricosanoic acid                                  | LMFA01010023;HMD<br>B0001160 | pos | C23H46O2    | Lipids and lipid-like molecules  |
| 2-amino-14,16-dimethyloctadecan-3-ol              | LMSP01080031                 | pos | C20H43NO    | -                                |
| Eicosanoyl-EA                                     | LMFA08040038                 | pos | C22H45NO2   | -                                |
| Prosopinine                                       | LMSP01080049                 | pos | C16H33NO3   | -                                |
| (1R,2R,4S)-p-Menthane-1,2,8-triol 8-<br>glucoside | HMDB0039894                  | pos | C16H30O8    | Organic oxygen compounds         |
| LysoSM(d18:0)                                     | HMDB0012082                  | pos | C23H51N2O5P | Lipids and lipid-like molecules  |
| Dihydromonacolin L                                | -                            | pos | C19H30O3    | -                                |
| Heneicosanoic acid                                | HMDB0002345;LMFA<br>01010021 | pos | C21H42O2    | Lipids and lipid-like molecules  |
| N,N,O-Tridesmethyltramadol                        | HMDB0060850                  | pos | C13H19NO2   | Benzenoids                       |
| (+)-4,11-Eudesmadien-3-one                        | HMDB0037061                  | pos | C15H22O     | Lipids and lipid-like molecules  |
| (+)-3,7(11)-Acoradiene                            | LMPR0103660002               | pos | C15H22O     | -                                |
| N-(14-Methylhexadecanoyl)pyrrolidine              | HMDB0034373                  | pos | C21H41NO    | Organoheterocyclic compounds     |
| Spisulosine                                       | LMSP01080032                 | pos | C18H39NO    | -                                |
| D-erythro-Sphingosine C-20                        | -                            | pos | C20H41NO2   | -                                |
| Allyl benzoate                                    | HMDB0040592                  | pos | C10H10O2    | Benzenoids                       |
| MG(a-21:0/0:0/0:0)[rac]                           | HMDB0072855                  | pos | C24H48O4    | Lipids and lipid-like molecules  |
| 9,10-epoxy-12-octadecenoic acid                   | LMFA02000280                 | pos | C18H32O3    | -                                |
| Dolicholide                                       | HMDB0034086                  | pos | C28H46O6    | Lipids and lipid-like molecules  |
| 10,20-Dihydroxyeicosanoic acid                    | HMDB0031923                  | pos | C20H40O4    | Lipids and lipid-like molecules  |
| Mutisianthol                                      | LMPR0103360001               | pos | C15H20O     | -                                |
| Polyoxyethylene 40 monostearate                   | HMDB0032477                  | pos | C20H40O3    | Lipids and lipid-like molecules  |
| MG(19:0/0:0/0:0)                                  | HMDB0072839                  | pos | C22H44O4    | Lipids and lipid-like molecules  |
| C16 Sphingosine                                   | LMSP01040008                 | pos | C16H33NO2   | -                                |
| Lucidenolactone                                   | HMDB0030897                  | pos | C27H36O6    | Lipids and lipid-like molecules  |
| 25-Hydroxyvitamin D3-26,23-lactone                | HMDB0060126                  | pos | C27H40O4    | Lipids and lipid-like molecules  |
| Austalide L                                       | HMDB0030158                  | pos | C25H32O6    | Phenylpropanoids and polyketides |
| Pectachol                                         | HMDB0039064                  | pos | C26H34O6    | Phenylpropanoids and polyketides |
| Ethyl salicylate                                  | HMDB0029817                  | pos | C9H10O3     | Benzenoids                       |
| Avocadene                                         | HMDB0031042;LMFA<br>05000639 | pos | C17H34O3    | Lipids and lipid-like molecules  |
| Pyruvophenone                                     | -                            | pos | C9H8O2      | -                                |
| Ricinoleic acid                                   | LMFA02000184;HMD<br>B0034297 | pos | C18H34O3    | Lipids and lipid-like molecules  |
| Secoeremopetasitolide A                           | HMDB0041364                  | pos | C19H26O7    | Lipids and lipid-like molecules  |

|                                                 |                           |     |            |                                 |
|-------------------------------------------------|---------------------------|-----|------------|---------------------------------|
| Oblongolide                                     | -                         | pos | C14H20O2   | -                               |
| (6b,7b,13R)-6,7-Diacetoxy-8,14-labdadiene-13-ol | HMDB0035288               | pos | C24H38O5   | Lipids and lipid-like molecules |
| Solasodine                                      | LMST01150004;HMD B0035282 | pos | C27H43NO2  | Lipids and lipid-like molecules |
| Heptadecanoic acid                              | HMDB0002259;LMFA 01010017 | pos | C17H34O2   | Lipids and lipid-like molecules |
| Xestoaminol C                                   | LMSP01080033              | pos | C14H31NO   | -                               |
| Isokobusone                                     | HMDB0036791               | pos | C14H22O2   | Organic oxygen compounds        |
| 4E,7Z,10Z-Tridecatrienyl acetate                | LMFA07010271              | pos | C15H24O2   | -                               |
| (1S,2R,4R)-p-Menth-8-ene-2,10-diol 2-glucoside  | HMDB0039055               | pos | C16H28O7   | Lipids and lipid-like molecules |
| (S)-11,12,13-Trinor-7-calamenone                | HMDB0040823               | pos | C12H14O    | Benzenoids                      |
| 13(S)-HOTrE                                     | -                         | pos | C18H30O3   | -                               |
| Corchorifatty acid D                            | HMDB0033243               | pos | C18H28O4   | Lipids and lipid-like molecules |
| Beta-Ionol                                      | HMDB0036820               | pos | C13H22O    | Lipids and lipid-like molecules |
| Lycoramine                                      | -                         | pos | C17H23NO3  | -                               |
| Blumenol C O-[apiosyl-(1->6)-glucoside]         | HMDB0031936               | pos | C24H40O11  | Lipids and lipid-like molecules |
| Capsaicin                                       | HMDB0002227;LMFA 08020085 | pos | C18H27NO3  | Benzenoids                      |
| Kessyl glycol                                   | HMDB0037197               | pos | C15H26O3   | Organoheterocyclic compounds    |
| Isoalantolactone                                | HMDB0035934               | pos | C15H20O2   | Lipids and lipid-like molecules |
| 6-Keto-prostaglandin F1a                        | HMDB0002886               | pos | C20H34O6   | Lipids and lipid-like molecules |
| (4E,d14:1) sphingosine                          | LMSP01040006              | pos | C14H29NO2  | -                               |
| Corey PG-Lactone Diol                           | -                         | pos | C15H24O4   | -                               |
| Floionolic acid                                 | LMFA02000147;HMD B0034295 | pos | C18H36O5   | Lipids and lipid-like molecules |
| (R)-1,3-Octanediol                              | HMDB0029359;LMFA 05000564 | pos | C8H18O2    | Lipids and lipid-like molecules |
| 2'-Deoxymugineic acid                           | HMDB0033909               | pos | C12H20N2O7 | Organic acids and derivatives   |
| Alanyl-Gamma-glutamate                          | HMDB0028701               | pos | C8H15N3O4  | Organic acids and derivatives   |
| Osmaronin                                       | HMDB0032769               | pos | C11H17NO6  | Lipids and lipid-like molecules |
| Heptane-1-thiol                                 | HMDB0032304               | pos | C7H16S     | Organosulfur compounds          |
| 3-hydroxydecanoyl carnitine                     | HMDB0061636               | pos | C17H33NO5  | Lipids and lipid-like molecules |
| 3,4-Dihydroxyphenylvaleric acid                 | HMDB0029233               | pos | C11H14O4   | Benzenoids                      |
| Gamma-Caprolactone                              | LMFA07040010;HMD B0003843 | pos | C6H10O2    | Organoheterocyclic compounds    |
| Dicyclohexyl disulfide                          | HMDB0041448               | pos | C12H22S2   | Organosulfur compounds          |

|                                                                                |                                |     |           |                                 |
|--------------------------------------------------------------------------------|--------------------------------|-----|-----------|---------------------------------|
| Methyl 3-(2,3-dihydroxy-3-methylbutyl)-4-hydroxybenzoate                       | HMDB0032796                    | pos | C13H18O5  | Benzenoids                      |
| Tanacetol A                                                                    | HMDB0035722                    | pos | C17H26O4  | Lipids and lipid-like molecules |
| Phaseic acid                                                                   | -                              | pos | C15H20O5  | -                               |
| Lauroyl diethanolamide                                                         | LMFA08040058;HMD<br>B0032358   | pos | C16H33NO3 | Lipids and lipid-like molecules |
| 2-(3-Hydroxyphenyl)ethanol 1'-glucoside                                        | HMDB0038332                    | pos | C14H20O7  | Organic oxygen compounds        |
| 12-Hydroxydodecanoic acid                                                      | HMDB0002059                    | pos | C12H24O3  | Organic acids and derivatives   |
| N-(2-Phenylethyl)-acetamide                                                    | -                              | pos | C10H13NO  | -                               |
| 16-Hydroxy hexadecanoic acid                                                   | HMDB0006294                    | pos | C16H32O3  | Lipids and lipid-like molecules |
| 2-Diethylaminoethanol                                                          | HMDB0033971                    | pos | C6H15NO   | Organic nitrogen compounds      |
| Indole-3-ethanol                                                               | -                              | pos | C10H11NO  | -                               |
| (S)-10,16-Dihydroxyhexadecanoic acid                                           | HMDB0037798                    | pos | C16H32O4  | Lipids and lipid-like molecules |
| Vanillic acid-4-O-glucuronide                                                  | HMDB0060024                    | pos | C15H18O9  | Organic oxygen compounds        |
| Carvotanacetone                                                                | HMDB0059875                    | pos | C10H16O   | Lipids and lipid-like molecules |
| 3,4,5,6-Tetrahydrohippuric acid                                                | HMDB0061679                    | pos | C9H13NO3  | Organic acids and derivatives   |
| Tricyclazole                                                                   | HMDB0031809                    | pos | C9H7N3S   | Organoheterocyclic compounds    |
| Dihydrophaseic acid                                                            | LMPR0103050005;HM<br>DB0038660 | pos | C15H22O5  | Lipids and lipid-like molecules |
| 4-formyl Indole                                                                | -                              | pos | C9H7NO    | -                               |
| 5-(3E-Pentenyl)tetrahydro-2-oxo-3-furancarboxylic acid                         | HMDB0030991                    | pos | C10H14O4  | Organoheterocyclic compounds    |
| Solanolone                                                                     | HMDB0033262                    | pos | C15H18O5  | Benzenoids                      |
| 1-H-Inden-1-one,2,3-dihydro-3,3,5,6-tetramethyl                                | HMDB0059683                    | pos | C13H16O   | Benzenoids                      |
| Benzenemethanol, 2-(2-hydroxypropoxy)-3-methyl-                                | -                              | pos | C11H16O3  | -                               |
| 3,7,8,15-Scirpenetetrol                                                        | HMDB0037560                    | pos | C15H22O6  | Lipids and lipid-like molecules |
| KAPA                                                                           | -                              | pos | C9H17NO3  | -                               |
| 7-Aminonitrazepam                                                              | HMDB0041819                    | pos | C15H13N3O | Organoheterocyclic compounds    |
| Cis-1,3,4,6,7,11b-Hexahydro-9-methoxy-2H-benzo[a]quinolizine-3-carboxylic acid | -                              | pos | C15H19NO3 | -                               |
| 2-ISOPROPYL-3-METHOXYCINNAMIC ACID                                             | -                              | pos | C13H16O3  | -                               |
| (R)-3,7-Dimethyl-5-indanecarboxylic acid                                       | HMDB0033033                    | pos | C12H14O2  | Benzenoids                      |
| 2,6-Dimethyl-4-hydroxybenzaldehyde                                             | -                              | pos | C9H10O2   | -                               |
| (E)-2-Butenyl-4-methyl-threonine                                               | -                              | pos | C9H17NO3  | -                               |
| Tenuazonic acid                                                                | HMDB0036074                    | pos | C10H15NO3 | Organoheterocyclic compounds    |

|                                                                         |                           |     |             |                                  |
|-------------------------------------------------------------------------|---------------------------|-----|-------------|----------------------------------|
| Dioscoretine                                                            | HMDB0038588               | pos | C13H23NO3   | Lipids and lipid-like molecules  |
| Sebiferic acid                                                          | HMDB0036774               | pos | C30H48O2    | Lipids and lipid-like molecules  |
| L-2-Amino-3-(4-aminophenyl)propanoic acid                               | HMDB0030397               | pos | C9H12N2O2   | Phenylpropanoids and polyketides |
| Isopentenyladenine-9-N-glucoside                                        | HMDB0012240               | pos | C17H25N5O4  | Organic oxygen compounds         |
| Trp-P-1                                                                 | -                         | pos | C13H13N3    | -                                |
| Glucosyl 6-hydroxy-2,6-dimethyl-2E,7-octadienoate                       | HMDB0035822               | pos | C16H26O8    | Organic oxygen compounds         |
| Margaroylglycine                                                        | HMDB0013246               | pos | C19H37NO3   | Organic acids and derivatives    |
| 9-Fluoro-16alpha-hydroxyandrost-4-ene-3,11,17-trione                    | -                         | pos | C19H23FO4   | -                                |
| 2-Amino-2-Norbornanecarboxylic acid                                     | -                         | pos | C8H13NO2    | -                                |
| 1-[(5-Amino-5-carboxypentyl)amino]-1-deoxyfructose                      | HMDB0034879               | pos | C12H24N2O7  | Organic oxygen compounds         |
| Leukotriene E3                                                          | LMFA03020074;HMD B0002355 | pos | C23H39NO5S  | Lipids and lipid-like molecules  |
| Ethyl (S)-3-hydroxybutyrate glucoside                                   | HMDB0031693               | pos | C12H22O8    | Lipids and lipid-like molecules  |
| 1,2,10-Trihydroxydihydro-trans-linalyl oxide 7-O-beta-D-glucopyranoside | HMDB0033237               | pos | C16H30O10   | Organic oxygen compounds         |
| Kynuramine                                                              | HMDB0012246               | pos | C9H12N2O    | Organic oxygen compounds         |
| Dolichodial                                                             | LMPR0102070037            | pos | C10H14O2    | -                                |
| Carbendazim                                                             | HMDB0031769               | pos | C9H9N3O2    | Organoheterocyclic compounds     |
| ALANYL-dl-PHENYLALANINE                                                 | -                         | pos | C12H16N2O3  | -                                |
| N5-(4-Methoxybenzyl)glutamine                                           | HMDB0033598               | pos | C13H18N2O4  | Organic acids and derivatives    |
| N-Acetylmuramoyl-Ala                                                    | HMDB0060494               | pos | C14H24N2O9  | Organic oxygen compounds         |
| Isoleucyl-Hydroxyproline                                                | HMDB0028908               | pos | C11H20N2O4  | Organic acids and derivatives    |
| Aminocaproic acid                                                       | HMDB0001901               | pos | C6H13NO2    | Lipids and lipid-like molecules  |
| Dexpanthenol                                                            | -                         | pos | C9H19NO4    | -                                |
| 8-Hydroxyoctanoate                                                      | HMDB0061914               | pos | C8H16O3     | Organic compounds                |
| Benzaldehyde                                                            | HMDB0006115               | pos | C7H6O       | Benzenoids                       |
| ALANYL-dl-LEUCINE                                                       | -                         | pos | C9H18N2O3   | -                                |
| 2,3-Dinor-6-keto-prostaglandin F1 a                                     | HMDB0002277               | pos | C18H30O6    | Lipids and lipid-like molecules  |
| Alitame                                                                 | HMDB0037324               | pos | C14H25N3O4S | Organic acids and derivatives    |
| EHNA                                                                    | -                         | pos | C14H23N5O   | -                                |
| 5-Aminopentanal                                                         | HMDB0012815               | pos | C5H11NO     | Organic oxygen compounds         |
| 2-Pyrrolidinone                                                         | HMDB0002039               | pos | C4H7NO      | Organoheterocyclic compounds     |
| 5'-Dehydroadenosine                                                     | -                         | pos | C10H11N5O4  | -                                |



|                                                            |                              |     |            |                                         |
|------------------------------------------------------------|------------------------------|-----|------------|-----------------------------------------|
| 5-(hydroxymethyl)- 2-Furancarboxylic acid                  | -                            | pos | C6H6O4     | -                                       |
| N-Acetyl-4-O-acetylneuraminic acid                         | HMDB0000796                  | pos | C13H21NO10 | Organic oxygen compounds                |
| Deoxyadenosine                                             | HMDB0000101                  | pos | C10H13N5O3 | Nucleosides, nucleotides, and analogues |
| Beta-Alaninamide                                           | -                            | pos | C3H8N2O    | -                                       |
| Threonyl-Hydroxyproline                                    | HMDB0029062                  | pos | C9H16N2O5  | Organic acids and derivatives           |
| Gamma-Glutamyl-beta-aminopropionitrile                     | HMDB0060477                  | pos | C8H13N3O3  | Organic acids and derivatives           |
| 4-O-Methyl-a-D-glucosyl-(1->2)-b-D-xylosyl-(1->4)-D-xylose | HMDB0039742                  | pos | C17H28O15  | Organic oxygen compounds                |
| D-Pipecolic acid                                           | HMDB0005960                  | pos | C6H11NO2   | Organic acids and derivatives           |
| Urocanic acid                                              | HMDB0000301                  | pos | C6H6N2O2   | Organoheterocyclic compounds            |
| 3-Buten-1-amine                                            | -                            | pos | C4H9N      | -                                       |
| 2-O-a-L-Fucopyranosyl-galactose                            | HMDB0006590                  | pos | C12H22O10  | Lipids and lipid-like molecules         |
| 1-AMINOCYCLOBUTANE<br>CARBOXYLIC ACID                      | -                            | pos | C5H9NO2    | -                                       |
| Ectoine                                                    | -                            | pos | C6H10N2O2  | -                                       |
| Gerberinol                                                 | HMDB0033304                  | pos | C21H16O6   | Phenylpropanoids and polyketides        |
| L-Carnitine                                                | HMDB0000062                  | pos | C7H15NO3   | Organic nitrogen compounds              |
| Tyrosyl-Hydroxyproline                                     | HMDB0029106                  | neg | C14H18N2O5 | Organic acids and derivatives           |
| Vanillin                                                   | HMDB0012308                  | neg | C8H8O3     | Benzenoids                              |
| Traumatic Acid                                             | HMDB0000933;LMFA<br>01170002 | neg | C12H20O4   | Lipids and lipid-like molecules         |
| 1,11-Undecanedicarboxylic acid                             | HMDB0002327                  | neg | C13H24O4   | Lipids and lipid-like molecules         |
| 2'-Deoxyuridine                                            | -                            | neg | C9H12N2O5  | -                                       |
| Hydroxyphenyllactic acid                                   | HMDB0000755                  | neg | C9H10O4    | Phenylpropanoids and polyketides        |
| Armillarinin                                               | HMDB0031674                  | neg | C24H29ClO7 | Lipids and lipid-like molecules         |
| P-Salicylic acid                                           | -                            | neg | C7H6O3     | -                                       |
| Adipic acid                                                | HMDB0000448;LMFA<br>01170048 | neg | C6H10O4    | Lipids and lipid-like molecules         |
| Gentisic acid                                              | HMDB0000152                  | neg | C7H6O4     | Benzenoids                              |
| Ethyl 5-oxotetrahydro-2-furancarboxylate                   | HMDB0059815                  | neg | C7H10O4    | Organoheterocyclic compounds            |
| ANHYDROBRAZILIC ACID                                       | -                            | neg | C12H10O5   | -                                       |
| 2-(2,5-dihydroxy-4-methoxyphenyl)acetic acid               | HMDB0130476                  | neg | C9H10O5    | Benzenoids                              |
| Suberic acid                                               | LMFA01170001;HMD<br>B0000893 | neg | C8H14O4    | Lipids and lipid-like molecules         |
| Juglone glucoside                                          | HMDB0033563                  | neg | C16H16O8   | Organooxygen compounds                  |
| Gamma-Glu-Leu                                              | -                            | neg | C11H20N2O5 | -                                       |

|                                                                     |                                |     |             |                                  |
|---------------------------------------------------------------------|--------------------------------|-----|-------------|----------------------------------|
| Undecanedioic acid                                                  | HMDB0000888;LMFA<br>01170007   | neg | C11H20O4    | Lipids and lipid-like molecules  |
| N-phosphocreatinate(2-)                                             | HMDB0062567                    | neg | C4H11N3O5P+ | -                                |
| Riesling acetal                                                     | HMDB0037562                    | neg | C13H22O3    | Organoheterocyclic compounds     |
| 2-Methylpropyl 2-aminobenzoate                                      | HMDB0035072                    | neg | C11H15NO2   | Benzenoids                       |
| 2,2'-(3-methylcyclohexane-1,1-diyl)diacetic acid                    | -                              | neg | C11H18O4    | -                                |
| PSOROMIC ACID                                                       | -                              | neg | C18H14O8    | -                                |
| (8alpha,10beta,11beta)-3-Hydroxy-4,15-dinor-1(5)-xanthen-12,8-olide | HMDB0037244                    | neg | C13H20O3    | Organoheterocyclic compounds     |
| 9,10,13-TriHOME                                                     | HMDB0004710                    | neg | C18H34O5    | Lipids and lipid-like molecules  |
| L-Citronellol glucoside                                             | HMDB0029850                    | neg | C16H30O6    | Lipids and lipid-like molecules  |
| C75                                                                 | -                              | neg | C14H22O4    | -                                |
| 6,15-Diketo,13,14-dihydro-PGF1a                                     | HMDB0001979                    | neg | C20H32O6    | Lipids and lipid-like molecules  |
| Gibberellin A53                                                     | LMPR0104170007;HM<br>DB0036895 | neg | C20H28O5    | Lipids and lipid-like molecules  |
| Tetradecanedioic acid                                               | HMDB0000872;LMFA<br>01170018   | neg | C14H26O4    | Lipids and lipid-like molecules  |
| Ajmaline                                                            | HMDB0015495                    | neg | C20H26N2O2  | Alkaloids and derivatives        |
| Deoxyribose                                                         | HMDB0003224                    | neg | C5H10O4     | Organic oxygen compounds         |
| Dulcitol                                                            | -                              | neg | C6H14O6     | -                                |
| Quinic acid                                                         | HMDB0003072                    | neg | C7H12O6     | Organic oxygen compounds         |
| L-Fucose                                                            | HMDB0000174                    | neg | C6H12O5     | Organic oxygen compounds         |
| L-Leucyl-L- Alanine                                                 | -                              | neg | C9H18N2O3   | -                                |
| 7-Methyladenine                                                     | HMDB0011614                    | neg | C6H7N5      | Organoheterocyclic compounds     |
| 2-Keto-6-acetamidocaproate                                          | HMDB0012150                    | neg | C8H13NO4    | Organic acids and derivatives    |
| L-Phenylalanine                                                     | HMDB0000159                    | neg | C9H11NO2    | Organic acids and derivatives    |
| 2-Ethylglutaric acid                                                | HMDB0059738                    | neg | C7H12O4     | Lipids and lipid-like molecules  |
| Xi-4-Hydroxy-4-methyl-2-cyclohexen-1-one                            | HMDB0033629                    | neg | C7H10O2     | Organic oxygen compounds         |
| Acetyl-L-tyrosine                                                   | -                              | neg | C11H13NO4   | -                                |
| 5-Methoxysalicylic acid                                             | HMDB0001868                    | neg | C8H8O4      | Benzenoids                       |
| 7-hydroxy-6-(hydroxymethyl)-2H-chromen-2-one                        | HMDB0136775                    | neg | C10H8O4     | Phenylpropanoids and polyketides |
| 8-Hydroxy-5,6-octadienoic acid                                      | LMFA01031076;HMD<br>B0031101   | neg | C8H12O3     | Organic acids and derivatives    |
| 1-(4Z,7Z,10Z,13Z,16Z,19Z-docosahexaenoyl)-glycero-3-phosphate       | HMDB0062307;LMGP<br>10050019   | neg | C25H39O7P   | Lipids and lipid-like molecules  |

|                                                                             |             |     |            |                                  |
|-----------------------------------------------------------------------------|-------------|-----|------------|----------------------------------|
| 4,7-Dihydroxy-2H-1-benzopyran-2-one                                         | HMDB0032951 | neg | C9H6O4     | Phenylpropanoids and polyketides |
| 2-n-Propyl-4-oxopentanoic acid                                              | HMDB0060683 | neg | C8H14O3    | Organic acids and derivatives    |
| 2-Propylglutaric acid                                                       | HMDB0060684 | neg | C8H14O4    | Lipids and lipid-like molecules  |
| 2-Ethylsuberic acid                                                         | HMDB0059708 | neg | C10H18O4   | Lipids and lipid-like molecules  |
| 4-Hydroxycoumarin                                                           | -           | neg | C9H6O3     | -                                |
| Cis-4-Hydroxycyclohexylacetic acid                                          | HMDB0000451 | neg | C8H14O3    | Organic oxygen compounds         |
| 2-HYDROXY-3,4-DIMETHOXYBENZOIC ACID                                         | HMDB0142084 | neg | C9H10O5    | Benzenoids                       |
| (R)-Byakangelicin 2'-(3-methylbutanoate)                                    | HMDB0039068 | neg | C22H26O8   | Phenylpropanoids and polyketides |
| 2,6-DIHYDROXY-4-METHOXYTOLUENE                                              | -           | neg | C8H10O3    | -                                |
| Sinapyl aldehyde                                                            | -           | neg | C11H12O4   | -                                |
| Acetyl-DL-Leucine                                                           | -           | neg | C8H15NO3   | -                                |
| 7-Hydroxy-6-methyl-2H-1-benzopyran-2-one                                    | HMDB0032990 | neg | C10H8O3    | Phenylpropanoids and polyketides |
| N-Acetyl-D-phenylalanine                                                    | -           | neg | C11H13NO3  | -                                |
| N-formylanthranilic acid                                                    | -           | neg | C8H7NO3    | -                                |
| (+)-cis-5,6-Dihydro-5-hydroxy-4-methoxy-6-(2-phenylethyl)-2H-pyran-2-one    | HMDB0029575 | neg | C14H16O4   | Phenylpropanoids and polyketides |
| 4-Hydroxycyclohexylcarboxylic acid                                          | HMDB0001988 | neg | C7H12O3    | Organic oxygen compounds         |
| 3-(4-Methylphenyl)oxiranecarboxylic acid                                    | HMDB0030903 | neg | C10H10O3   | Benzenoids                       |
| (4S,8R)-8,9-Dihydroxy-p-menth-1(6)-en-2-one                                 | HMDB0039052 | neg | C10H16O3   | Lipids and lipid-like molecules  |
| 7-hydroxy-1-oxo-1H-isochromene-3-carboxylic acid                            | HMDB0128623 | neg | C10H6O5    | Phenylpropanoids and polyketides |
| 5-(2'-Carboxyethyl)-4,6-Dihydroxypicolinate                                 | HMDB0006794 | neg | C9H9NO6    | Organoheterocyclic compounds     |
| Pratenol A                                                                  | HMDB0040630 | neg | C14H12O5   | Organoheterocyclic compounds     |
| 3alpha-Hydroxyoreadone                                                      | HMDB0036047 | neg | C14H20O4   | Organoheterocyclic compounds     |
| Lysyl-Phenylalanine                                                         | HMDB0028958 | neg | C15H23N3O3 | Organic acids and derivatives    |
| Caffeic Acid                                                                | HMDB0001964 | neg | C9H8O4     | Phenylpropanoids and polyketides |
| METHYLNORLICHEXANTHONE                                                      | -           | neg | C15H12O5   | -                                |
| 4-Methoxycinnamic acid                                                      | HMDB0002040 | neg | C10H10O3   | Phenylpropanoids and polyketides |
| Alpha-Phenylcyclohexylglycolic acid                                         | -           | neg | C14H18O3   | -                                |
| 2-{[hydroxy(6-hydroxy-2H-1,3-benzodioxol-5-yl)methylidene]amino}acetic acid | HMDB0129401 | neg | C10H9NO6   | Organic acids and derivatives    |
| 2-Propanoylthiophene                                                        | HMDB0033159 | neg | C7H8OS     | Organic oxygen compounds         |

|                                                                                  |                                |     |           |                                  |
|----------------------------------------------------------------------------------|--------------------------------|-----|-----------|----------------------------------|
| (E)-10-Hydroxy-8-decenoic acid                                                   | HMDB0039533                    | neg | C10H18O3  | Organic acids and derivatives    |
| Monotropein                                                                      | HMDB0035608;LMPR<br>0102070012 | neg | C16H22O11 | Lipids and lipid-like molecules  |
| {[1-(4-methoxyphenyl)-4-methylpent-1-en-3-yl]oxy)sulfonic acid                   | HMDB0132959                    | neg | C13H18O5S | Benzenoids                       |
| 2,4-DINITROPHENOL                                                                | -                              | neg | C6H4N2O5  | -                                |
| Talaromycin A                                                                    | HMDB0030143                    | neg | C12H22O4  | Organic oxygen compounds         |
| (1R,2R,3S,1'R)-Nepetalinic acid                                                  | HMDB0034971                    | neg | C10H16O4  | Lipids and lipid-like molecules  |
| 5-Hydroxy-p-mentha-6,8-dien-2-one                                                | HMDB0037011                    | neg | C10H14O2  | Lipids and lipid-like molecules  |
| 2-Carboxy-4-dodecanolide                                                         | HMDB0030987                    | neg | C13H22O4  | Organoheterocyclic compounds     |
| 2-Hydroxyundecanoate                                                             | HMDB0059736                    | neg | C11H22O3  | Lipids and lipid-like molecules  |
| Gamma-CEHC                                                                       | HMDB0001931                    | neg | C15H20O4  | Organoheterocyclic compounds     |
| 13-Oxo-9,11-tridecadienoic acid                                                  | LMFA01060202;HMD<br>B0034564   | neg | C13H20O3  | Lipids and lipid-like molecules  |
| Xi-8,9-Dehydrotheaspirone                                                        | HMDB0035181                    | neg | C13H18O2  | Organic oxygen compounds         |
| 2-nonenoylglycine                                                                | HMDB0094807                    | neg | C11H19NO3 | Organic acids and derivatives    |
| 6-(1-carboxy-1-methylethoxy)-3,4,5-trihydroxyoxane-2-carboxylic acid             | HMDB0126113                    | neg | C10H16O9  | Organic oxygen compounds         |
| 5,7-dihydroxy-2-(4-hydroxyphenyl)-8-(3,4,5-trihydroxyoxan-2-yl)-4H-chromen-4-one | HMDB0127225                    | neg | C20H18O9  | Phenylpropanoids and polyketides |
| (10betaH,11xi)-11-Hydroxy-13-nor-6-eremophilen-8-one                             | HMDB0037605                    | neg | C14H22O2  | Lipids and lipid-like molecules  |
| Aflatoxin B2                                                                     | HMDB0035208                    | neg | C17H14O6  | Phenylpropanoids and polyketides |
| 12,20-Dioxo-leukotriene B4                                                       | HMDB0060094                    | neg | C20H28O5  | Lipids and lipid-like molecules  |
| 15d PGD2                                                                         | HMDB0060046                    | neg | C20H30O4  | Lipids and lipid-like molecules  |
| L-Menthyl (R,S)-3-hydroxybutyrate                                                | HMDB0032370                    | neg | C14H26O3  | Lipids and lipid-like molecules  |
| Eremopetasidione                                                                 | HMDB0040778                    | neg | C14H20O3  | Lipids and lipid-like molecules  |
| 3,4,5-trihydroxy-6-{4-[(1E)-3-oxopent-1-en-1-yl]phenoxy}oxane-2-carboxylic acid  | HMDB0132988                    | neg | C17H20O8  | Organic oxygen compounds         |
| Panaxytriol                                                                      | HMDB0031928;LMFA<br>05000027   | neg | C17H26O3  | Lipids and lipid-like molecules  |
| Tatridin B                                                                       | HMDB0036931                    | neg | C15H20O4  | Lipids and lipid-like molecules  |
| 3-[[5-Methyl-2-(1-methylethyl)cyclohexyl]oxy]-1,2-propanediol                    | HMDB0036133                    | neg | C13H26O3  | Lipids and lipid-like molecules  |
| ACRL Toxin II                                                                    | HMDB0030496                    | neg | C17H24O5  | Lipids and lipid-like molecules  |
| 7-Sulfocholic acid                                                               | LMST05020039;HMD<br>B0002421   | neg | C24H40O8S | Lipids and lipid-like molecules  |

|                                                                  |                              |     |             |                                         |
|------------------------------------------------------------------|------------------------------|-----|-------------|-----------------------------------------|
| Annunione C                                                      | HMDB0032689                  | neg | C13H20O3    | Organoheterocyclic compounds            |
| Alpha-CEHC                                                       | HMDB0001518                  | neg | C16H22O4    | Organoheterocyclic compounds            |
| Hydroxypelenolide                                                | HMDB0036663                  | neg | C15H24O3    | Lipids and lipid-like molecules         |
| Neocnidilide                                                     | HMDB0034450                  | neg | C12H18O2    | Organoheterocyclic compounds            |
| Deacetyldiltiazem                                                | HMDB0002873                  | neg | C20H24N2O3S | Organoheterocyclic compounds            |
| Ethylene brassylate                                              | HMDB0040459                  | neg | C15H26O4    | Phenylpropanoids and polyketides        |
| Allocholic acid                                                  | HMDB0000505;LMST<br>04010092 | neg | C24H40O5    | Lipids and lipid-like molecules         |
| 8-Deoxy-11,13-dihydroxygrosheimin                                | HMDB0041144                  | neg | C15H20O5    | Lipids and lipid-like molecules         |
| (12,13-DiHOME                                                    | -                            | neg | C18H34O4    | -                                       |
| Tetranor-12(R)-HETE                                              | -                            | neg | C16H26O3    | -                                       |
| Zileuton O-glucuronide                                           | HMDB0060914                  | neg | C17H20N2O8S | Organic oxygen compounds                |
| (13-HpODE                                                        | -                            | neg | C18H32O4    | -                                       |
| Carnosol                                                         | HMDB0002121                  | neg | C20H26O4    | Lipids and lipid-like molecules         |
| Neriantogenin                                                    | HMDB0030044                  | neg | C23H32O4    | Lipids and lipid-like molecules         |
| Lansiumarin A                                                    | HMDB0034837                  | neg | C21H20O5    | Phenylpropanoids and polyketides        |
| LysoPE(15:0/0:0)                                                 | HMDB0011502                  | neg | C20H42NO7P  | Lipids and lipid-like molecules         |
| 2-Hydroxymyristic Acid                                           | HMDB0002261;LMFA<br>01050484 | neg | C14H28O3    | Lipids and lipid-like molecules         |
| Mabiogenin 3-[rhamnosyl-(1->6)-<br>[glucosyl-(1->2)]-glucoside]  | HMDB0040942                  | neg | C48H78O19   | Lipids and lipid-like molecules         |
| N-Undecylbenzenesulfonic acid                                    | HMDB0032549                  | neg | C17H28O3S   | Benzenoids                              |
| Cincassiol B                                                     | HMDB0036855                  | neg | C20H32O8    | Lipids and lipid-like molecules         |
| Armillarivin                                                     | HMDB0038917                  | neg | C23H28O5    | -                                       |
| 2-hydroxyhexadecanoic acid                                       | HMDB0031057                  | neg | C16H32O3    | Lipids and lipid-like molecules         |
| LysoPC(18:0)                                                     | HMDB0010384                  | neg | C26H54NO7P  | Lipids and lipid-like molecules         |
| 5-Fluorodeoxyuridine monophosphate                               | HMDB0060394                  | neg | C9H12FN2O8P | Nucleosides, nucleotides, and analogues |
| 2-Dodecylbenzenesulfonic acid                                    | HMDB0031031                  | neg | C18H30O3S   | Benzenoids                              |
| PA(18:4(6Z,9Z,12Z,15Z)/14:1(9Z))                                 | LMGP10010426;HMD<br>B0115028 | neg | C35H59O8P   | Lipids and lipid-like molecules         |
| PG(16:0/0:0)[U]                                                  | -                            | neg | C22H45O9P   | -                                       |
| 1-Oleoylglycerophosphoinositol                                   | HMDB0061693                  | neg | C27H51O12P  | Lipids and lipid-like molecules         |
| 11,12,14-Trihydroxy-7-methoxy-8,11,13-<br>abietatrien-20,6-olide | HMDB0031932                  | neg | C21H28O6    | Lipids and lipid-like molecules         |
| Cyclopassifloside X                                              | HMDB0036365                  | neg | C37H62O12   | Lipids and lipid-like molecules         |
| PA(14:1(9Z)/20:4(5Z,8Z,11Z,14Z))                                 | LMGP10010129;HMD<br>B0114801 | neg | C37H63O8P   | Lipids and lipid-like molecules         |

|                                                           |                              |     |             |                                  |
|-----------------------------------------------------------|------------------------------|-----|-------------|----------------------------------|
| Dihydro-3-(1-octenyl)-2,5-furandione                      | HMDB0037816                  | neg | C12H18O3    | Organoheterocyclic compounds     |
| 1-(11Z-eicosenoyl)-glycero-3-phosphate                    | HMDB0062305;LMGP<br>10050026 | neg | C23H45O7P   | Lipids and lipid-like molecules  |
| Indacaterol-8-O-glucuronide                               | HMDB0061152                  | neg | C30H36N2O9  | Organic oxygen compounds         |
| Manglupenone                                              | HMDB0030395                  | neg | C30H44O2    | Lipids and lipid-like molecules  |
| Adenine                                                   | HMDB0000034                  | neg | C5H5N5      | Organoheterocyclic compounds     |
| S-Cysteinossuccinic acid                                  | HMDB0029418                  | neg | C7H11NO6S   | Organic acids and derivatives    |
| Nevskin                                                   | HMDB0030162                  | neg | C24H32O5    | Phenylpropanoids and polyketides |
| PS(15:0/16:0)                                             | LMGP03010917;HMD<br>B0112281 | neg | C37H72NO10P | Lipids and lipid-like molecules  |
| PE(15:0/16:1(9Z))                                         | HMDB0008891;LMGP<br>02011235 | neg | C36H70NO8P  | Lipids and lipid-like molecules  |
| 20-Trihydroxy-leukotriene-B4                              | LMFA03020066;HMD<br>B0012643 | neg | C20H32O7    | Lipids and lipid-like molecules  |
| (R)-6'-O-(4-Geranyloxy-2-hydroxycinnamoyl)-marmin         | HMDB0039061                  | neg | C38H46O8    | Lipids and lipid-like molecules  |
| 1-Palmitoylglycerophosphoinositol                         | HMDB0061695                  | neg | C25H49O12P  | Lipids and lipid-like molecules  |
| Theasapogenol A                                           | HMDB0034519                  | neg | C30H50O6    | Lipids and lipid-like molecules  |
| 13,14-Dihydro-15-keto-PGE2                                | HMDB0002776;LMFA<br>03010031 | neg | C20H32O5    | Lipids and lipid-like molecules  |
| Alpha-Ionol O-[arabinosyl-(1->6)-glucoside]               | HMDB0038732                  | neg | C24H40O10   | -                                |
| LysoPC(16:0)                                              | HMDB0010382                  | neg | C24H50NO7P  | Lipids and lipid-like molecules  |
| Ethisterone                                               | HMDB0060580                  | neg | C21H28O2    | Lipids and lipid-like molecules  |
| Methyl cis-p-coumarate 3-(3,7-dimethyl-2,6-octadienyl)    | HMDB0041152                  | neg | C20H26O3    | Phenylpropanoids and polyketides |
| LysoPE(16:1(9Z)/0:0)                                      | HMDB0011504                  | neg | C21H42NO7P  | Lipids and lipid-like molecules  |
| Armillasin                                                | HMDB0038742                  | neg | C22H28O5    | -                                |
| Mannitol 1-phosphate                                      | HMDB0001530                  | neg | C6H15O9P    | Organic oxygen compounds         |
| TOFA                                                      | -                            | neg | C19H32O4    | -                                |
| (3S,7E,9S)-9-Hydroxy-4,7-megastigmadien-3-one 9-glucoside | HMDB0036822                  | neg | C19H30O7    | Lipids and lipid-like molecules  |
| 1-(2,6,6-Trimethyl-2-cyclohexen-1-yl)-1,6-heptadien-3-one | HMDB0029704                  | neg | C16H24O     | Lipids and lipid-like molecules  |
| ()9-HODE                                                  | -                            | neg | C18H32O3    | -                                |
| Formebolone                                               | HMDB0004631                  | neg | C21H28O4    | Lipids and lipid-like molecules  |
| (-)(E)-13-Hydroxy-10-oxo-11-octadecenoic acid             | HMDB0040900                  | neg | C18H32O4    | Lipids and lipid-like molecules  |
| LysoPE(14:1(9Z)/0:0)                                      | HMDB0011501                  | neg | C19H38NO7P  | Lipids and lipid-like molecules  |

|                                                            |                                |     |            |                                  |
|------------------------------------------------------------|--------------------------------|-----|------------|----------------------------------|
| 4-Hydroxyretinoic acid                                     | HMDB0006254                    | neg | C20H28O3   | Lipids and lipid-like molecules  |
| Salsoline-1-carboxylate                                    | HMDB0013067                    | neg | C12H15NO4  | Organoheterocyclic compounds     |
| 5-Tetradecenoic acid                                       | HMDB0000499                    | neg | C14H26O2   | Lipids and lipid-like molecules  |
| Glandulone C                                               | HMDB0039859                    | neg | C15H20O3   | Lipids and lipid-like molecules  |
| 12-hydroxyheptadecanoic acid                               | HMDB0061663                    | neg | C17H34O3   | Lipids and lipid-like molecules  |
| Acetylvalerenolic acid                                     | HMDB0035687                    | neg | C17H24O4   | Lipids and lipid-like molecules  |
| Dehydrovomifoliol                                          | HMDB0036819;LMPR<br>0103050009 | neg | C13H18O3   | Lipids and lipid-like molecules  |
| MG(0:0/14:1(9Z)/0:0)                                       | HMDB0011531                    | neg | C17H32O4   | Lipids and lipid-like molecules  |
| Aflatoxin GM1                                              | HMDB0030477                    | neg | C17H12O8   | Phenylpropanoids and polyketides |
| Melleolide D                                               | HMDB0037042                    | neg | C24H31ClO8 | Lipids and lipid-like molecules  |
| Nonanal propyleneglycol acetal                             | HMDB0032440                    | neg | C12H24O2   | Organoheterocyclic compounds     |
| 2,4,5,7alpha-Tetrahydro-1,4,4,7a-tetramethyl-1H-inden-2-ol | HMDB0036684                    | neg | C13H20O    | Organic oxygen compounds         |
| TUBAIC ACID                                                | -                              | neg | C12H12O4   | -                                |
| Valerenic acid                                             | HMDB0030016;LMPR<br>0103460001 | neg | C15H22O2   | Lipids and lipid-like molecules  |
| Octadecanedioic acid                                       | LMFA01170029;HMD<br>B0000782   | neg | C18H34O4   | Lipids and lipid-like molecules  |
| 2,3-dinor Prostaglandin E1                                 | -                              | neg | C18H30O5   | -                                |
| Sterebin G                                                 | HMDB0035380                    | neg | C20H34O5   | Lipids and lipid-like molecules  |
| Costunolide                                                | HMDB0036688                    | neg | C15H20O2   | Lipids and lipid-like molecules  |
| Tetranor-PGAM                                              | -                              | neg | C16H22O6   | -                                |
| Dihydro-3-coumaric acid                                    | -                              | neg | C9H10O3    | -                                |
| (E)-10-Oxo-8-decenoic acid                                 | LMFA01030949;HMD<br>B0040883   | neg | C10H16O3   | Lipids and lipid-like molecules  |
| 3,4-Dimethyl-5-pentyl-2-furanpentanoic acid                | HMDB0112085                    | neg | C16H26O3   | Lipids and lipid-like molecules  |
| 3"-O-Caffeoylcosmosiin                                     | HMDB0037345                    | neg | C30H26O13  | Phenylpropanoids and polyketides |
| 13-Nor-6-eremophilene-8,11-dione                           | HMDB0037606                    | neg | C14H20O2   | Lipids and lipid-like molecules  |
| 7,8-Dehydroastaxanthianthin                                | HMDB0036872                    | neg | C40H50O4   | Lipids and lipid-like molecules  |
| 3-phenyl-3,4-dihydro-2H-1-benzopyran-7-ol                  | HMDB0141210                    | neg | C15H14O2   | Phenylpropanoids and polyketides |
| 11,12,13-Trinor-1,3,5-bisabolatrien-10-oic acid            | HMDB0039643                    | neg | C12H16O2   | Lipids and lipid-like molecules  |
| 2'-Oxoaloesol 7-glucoside                                  | HMDB0035734                    | neg | C19H22O9   | Organic oxygen compounds         |
| Pantoyllactone glucoside                                   | HMDB0041269                    | neg | C12H20O8   | Lipids and lipid-like molecules  |
| Xi-7-Hydroxyhexadecanedioic acid                           | HMDB0037830                    | neg | C16H30O5   | Lipids and lipid-like molecules  |

|                                                                   |                          |     |             |                                         |
|-------------------------------------------------------------------|--------------------------|-----|-------------|-----------------------------------------|
| 3,4-DHPEA-EA                                                      | HMDB0029304              | neg | C19H22O8    | Lipids and lipid-like molecules         |
| Histidinyl-Proline                                                | HMDB0028893              | neg | C11H16N4O3  | Organic acids and derivatives           |
| 3,14-Dihydroxy-11,13-dihydrocostunolide                           | HMDB0035647              | neg | C15H22O4    | Lipids and lipid-like molecules         |
| 6-Hydroxypentadecanedioic acid                                    | HMDB0031885              | neg | C15H28O5    | Lipids and lipid-like molecules         |
| 5,6-Dihydro-4-methoxy-6-[2-(4-methoxyphenyl)ethyl]-2H-pyran-2-one | HMDB0030549              | neg | C15H18O4    | Phenylpropanoids and polyketides        |
| 3,4-Dimethyl-5-pentyl-2-furanpropanoic acid                       | HMDB0112083              | neg | C14H22O3    | Lipids and lipid-like molecules         |
| Comosin                                                           | HMDB0033254              | neg | C19H18O8    | Phenylpropanoids and polyketides        |
| 3-(2H-1,3-benzodioxol-5-yl)-3-oxopropanoic acid                   | HMDB0129376              | neg | C10H8O5     | Organoheterocyclic compounds            |
| Chlorogenoquinone                                                 | HMDB0029383              | neg | C16H16O9    | Organic oxygen compounds                |
| Marindinin                                                        | HMDB0029504              | neg | C14H16O3    | Phenylpropanoids and polyketides        |
| Quadrone                                                          | -                        | neg | C15H20O3    | -                                       |
| BENTAZON                                                          | -                        | neg | C10H12N2O3S | -                                       |
| Cucurbitic acid                                                   | HMDB0029388              | neg | C12H20O3    | Lipids and lipid-like molecules         |
| 3-Oxododecanoic acid                                              | HMDB0010727              | neg | C12H22O3    | Organic acids and derivatives           |
| (S)-5'-Deoxy-5'-(methylsulfinyl)adenosine                         | HMDB0033662              | neg | C11H15N5O4S | Nucleosides, nucleotides, and analogues |
| 5-Hydroxyflavone                                                  | HMDB0040556              | neg | C21H20O8    | Phenylpropanoids and polyketides        |
| L-Thyronine                                                       | HMDB0000667              | neg | C15H15NO4   | Organic acids and derivatives           |
| 1,8-Dihydroxy-3-hydroxymethylanthraquinone 8-O-b-D-glucoside      | HMDB0029679              | neg | C21H20O10   | Benzenoids                              |
| 1-Methyladenosine                                                 | HMDB0003331              | neg | C11H15N5O4  | Nucleosides, nucleotides, and analogues |
| Grevilline A                                                      | HMDB0029535              | neg | C18H12O6    | Organoheterocyclic compounds            |
| Eremopetasinorol                                                  | HMDB0029668              | neg | C13H20O2    | Organooxygen compounds                  |
| Polyethylene, oxidized                                            | HMDB0032472              | neg | C12H20O5    | Lipids and lipid-like molecules         |
| 8-Hydroxy-2-methoxy-6-methyl-1,4-naphthoquinone                   | HMDB0030769              | neg | C12H10O4    | Benzenoids                              |
| Phenethylamine glucuronide                                        | HMDB0010323              | neg | C14H19NO6   | Organic oxygen compounds                |
| (S)-9-Hydroxy-10-undecenoic acid                                  | HMDB0032662;LMFA01050436 | neg | C11H20O3    | Organic acids and derivatives           |
| Withaperuvin E                                                    | HMDB0030127              | neg | C28H36O8    | Lipids and lipid-like molecules         |
| 3-Oxoctanoic acid                                                 | HMDB0010721              | neg | C8H14O3     | Organic acids and derivatives           |
| 3,5-dichlorosalicylic acid                                        | -                        | neg | C7H4Cl2O3   | -                                       |
| Cystathionine ketimine                                            | HMDB0002015              | neg | C7H9NO4S    | Organic acids and derivatives           |
| 5-Deoxyribose-1-phosphate                                         | HMDB0060393              | neg | C5H11O7P    | Organic oxygen compounds                |
| 8-Hydroxyguanosine                                                | HMDB0002044              | neg | C10H13N5O6  | Nucleosides, nucleotides, and analogues |



|                                                                     |                              |     |           |                                  |
|---------------------------------------------------------------------|------------------------------|-----|-----------|----------------------------------|
| Azelaic acid                                                        | HMDB0000784;LMFA<br>01170054 | neg | C9H16O4   | Lipids and lipid-like molecules  |
| CRESOPYRINE                                                         | -                            | neg | C10H10O4  | -                                |
| (Z)-5-[(5-Methyl-2-thienyl)methylene]-<br>2(5H)-furanone            | HMDB0033845                  | neg | C10H8O2S  | Organoheterocyclic compounds     |
| 3,5-DINITROCATECHOL (OR-486)                                        | -                            | neg | C6H4N2O6  | -                                |
| 2,4-Dihydroxy-7-methoxy-2H-1,4-<br>benzoxazin-3(4H)-one             | HMDB0034864                  | neg | C9H9NO5   | Organoheterocyclic compounds     |
| 4-Nitrophenol                                                       | HMDB0062627;HMDB<br>0001232  | neg | C6H5NO3   | Benzenoids                       |
| Ureidoisobutyric acid                                               | HMDB0002031                  | neg | C5H10N2O3 | Organic acids and derivatives    |
| (3R,5Z)-5-Octene-1,3-diol                                           | LMFA05000556;HMD<br>B0030368 | neg | C8H16O2   | Lipids and lipid-like molecules  |
| Ferulic acid                                                        | -                            | neg | C10H10O4  | -                                |
| Amyl salicylate                                                     | HMDB0038604                  | neg | C12H16O3  | Benzenoids                       |
| 6-Methoxy-2(3H)-benzoxazolone                                       | HMDB0036582                  | neg | C8H7NO3   | Organoheterocyclic compounds     |
| 6-[(E)-2-(3,4-dihydroxyphenyl)ethenyl]-4-<br>methoxy-2H-pyran-2-one | HMDB0131199                  | neg | C14H12O5  | Phenylpropanoids and polyketides |
| 6-beta-hydroxymedroxyprogesterone                                   | HMDB0061063                  | neg | C22H32O4  | Lipids and lipid-like molecules  |
| (1beta,2beta,5beta)-p-Menth-3-ene-1,2,5-<br>triol                   | HMDB0038978                  | neg | C10H18O3  | Lipids and lipid-like molecules  |
| 9-Oxo-nonanoic acid                                                 | HMDB0094711;LMFA<br>01060160 | neg | C9H16O3   | Lipids and lipid-like molecules  |
| DL-Benzylsuccinic acid                                              | -                            | neg | C11H12O4  | -                                |
| 6,8-dihydroxy-7-methoxy-2H-chromen-2-<br>one                        | HMDB0130546                  | neg | C10H8O5   | Phenylpropanoids and polyketides |
| 4-Hydroxy-8-methoxy-2H-furo[2,3-h]-1-<br>benzopyran-2-one           | HMDB0032659                  | neg | C12H8O5   | Phenylpropanoids and polyketides |
| 8H-1,3-Dioxolo[4,5-h][1]benzopyran-8-one                            | HMDB0039045                  | neg | C10H6O4   | Phenylpropanoids and polyketides |
| 4-Nitrocatechol                                                     | HMDB0002916                  | neg | C6H5NO4   | Benzenoids                       |
| Phenyllactic acid                                                   | HMDB0000779                  | neg | C9H10O3   | Phenylpropanoids and polyketides |
| 3,4,5-trihydroxy-6-(3-<br>methoxyphenoxy)oxane-2-carboxylic acid    | HMDB0135642                  | neg | C13H16O8  | Organic oxygen compounds         |
| Botryodiplodin                                                      | HMDB0036594                  | neg | C7H12O3   | Organoheterocyclic compounds     |
| Urolithin B                                                         | HMDB0013696                  | neg | C13H8O3   | Phenylpropanoids and polyketides |
| 5,7-Dihydroxy-3-(3-hydroxy-4-<br>methoxybenzyl)-4-chromanone        | HMDB0037477                  | neg | C17H16O6  | Phenylpropanoids and polyketides |
| Indole-3-carboxylic acid                                            | HMDB0003320                  | neg | C9H7NO2   | Organoheterocyclic compounds     |
| Xanthurenic acid                                                    | HMDB0000881                  | neg | C10H7NO4  | Organoheterocyclic compounds     |

|                                                                       |             |     |            |                                         |
|-----------------------------------------------------------------------|-------------|-----|------------|-----------------------------------------|
| 2beta,9xi-Dihydroxy-8-oxo-1(10),4,11(13)-germacatrien-12,6alpha-olide | HMDB0036662 | neg | C15H18O5   | Lipids and lipid-like molecules         |
| Benzoquinoneacetic acid                                               | HMDB0002334 | neg | C8H6O4     | Organic oxygen compounds                |
| 1-oxo-1H-isochromene-3-carboxylic acid                                | HMDB0128616 | neg | C10H6O4    | Phenylpropanoids and polyketides        |
| Scopoletin                                                            | HMDB0034344 | neg | C10H8O4    | Phenylpropanoids and polyketides        |
| DIPROTIN A                                                            | -           | neg | C17H31N3O4 | -                                       |
| Methyl (3b,11x)-3-Hydroxy-8-oxo-6-eremophilin-12-oate                 | HMDB0041229 | neg | C16H24O4   | Lipids and lipid-like molecules         |
| Alpha-Carboxy-delta-nonalactone                                       | HMDB0030990 | neg | C10H16O4   | Organoheterocyclic compounds            |
| 1,4-Benzodioxin-2(3H)-one                                             | HMDB0040528 | neg | C8H6O3     | Organoheterocyclic compounds            |
| Gamma-Glutamyltryptophan                                              | HMDB0029160 | neg | C16H19N3O5 | Organic acids and derivatives           |
| 3-Methyladipic acid                                                   | HMDB0000555 | neg | C7H12O4    | Lipids and lipid-like molecules         |
| Uralenneoside                                                         | HMDB0041272 | neg | C12H14O8   | Benzenoids                              |
| 7-Hydroxy-2-methyl-4-oxo-4H-1-benzopyran-5-carboxylic acid            | HMDB0036346 | neg | C11H8O5    | Organoheterocyclic compounds            |
| 2-Isopropylmalic acid                                                 | HMDB0000402 | neg | C7H12O5    | Lipids and lipid-like molecules         |
| 3-hydroxy-3-(3-hydroxyphenyl)propanoic acid-O-sulphate                | HMDB0059967 | neg | C9H10O7S   | Organic acids and derivatives           |
| 6-O-Methylarmillaridin                                                | HMDB0035690 | neg | C25H31ClO6 | Lipids and lipid-like molecules         |
| Acetyl-DL-Valine                                                      | -           | neg | C7H13NO3   | -                                       |
| Imidaprilat                                                           | HMDB0041908 | neg | C18H23N3O6 | Organic acids and derivatives           |
| (-)-trans-3,4-Dihydro-4,8-dihydroxy-3-methyl-1H-2-benzopyran-1-one    | HMDB0030765 | neg | C10H10O4   | Organoheterocyclic compounds            |
| Propyl propane thiosulfonate                                          | HMDB0032496 | neg | C11H16O5   | Organooxygen compounds                  |
| 5-[(2,4,5-trihydroxyphenyl)methyl]oxolan-2-one                        | HMDB0128183 | neg | C11H12O5   | Benzenoids                              |
| Phyllanthusol B                                                       | HMDB0035904 | neg | C35H49NO18 | Organic oxygen compounds                |
| Neoacrimarine K                                                       | HMDB0033192 | neg | C31H29NO9  | Phenylpropanoids and polyketides        |
| 2-(sulfooxy)acetic acid                                               | HMDB0124940 | neg | C2H4O6S    | Organic acids and derivatives           |
| 4-Pyridoxic acid                                                      | HMDB0000017 | neg | C8H9NO4    | Organoheterocyclic compounds            |
| Deoxyguanosine                                                        | HMDB0000085 | neg | C10H13N5O4 | Nucleosides, nucleotides, and analogues |
| Guanosine                                                             | HMDB0000133 | neg | C10H13N5O5 | Nucleosides, nucleotides, and analogues |
| Gentiotriose                                                          | HMDB0029910 | neg | C18H32O16  | Organic oxygen compounds                |
| Hydroxyminaline                                                       | HMDB0034368 | neg | C5H5NO3    | Organoheterocyclic compounds            |
| (3,4,5,6-tetrahydroxyoxan-2-yl)methyl acetate                         | HMDB0125202 | neg | C8H14O7    | -                                       |
| 2-C-Methyl-1,4-erythrano-D-lactone                                    | HMDB0029884 | neg | C5H8O4     | Organoheterocyclic compounds            |
| Isocitrate                                                            | -           | neg | C6H8O7     | -                                       |

|                                   |             |     |           |                              |
|-----------------------------------|-------------|-----|-----------|------------------------------|
| N-Acetyl-DL-serine                | -           | neg | C5H9NO4   | -                            |
| O2'-4a-cyclic-tetrahydrobiopterin | HMDB0013031 | neg | C9H13N5O3 | Organoheterocyclic compounds |
| Panose                            | HMDB0029937 | neg | C18H32O16 | Organic oxygen compounds     |

Note: pos and neg are positive ion and negative ion respectively.

---

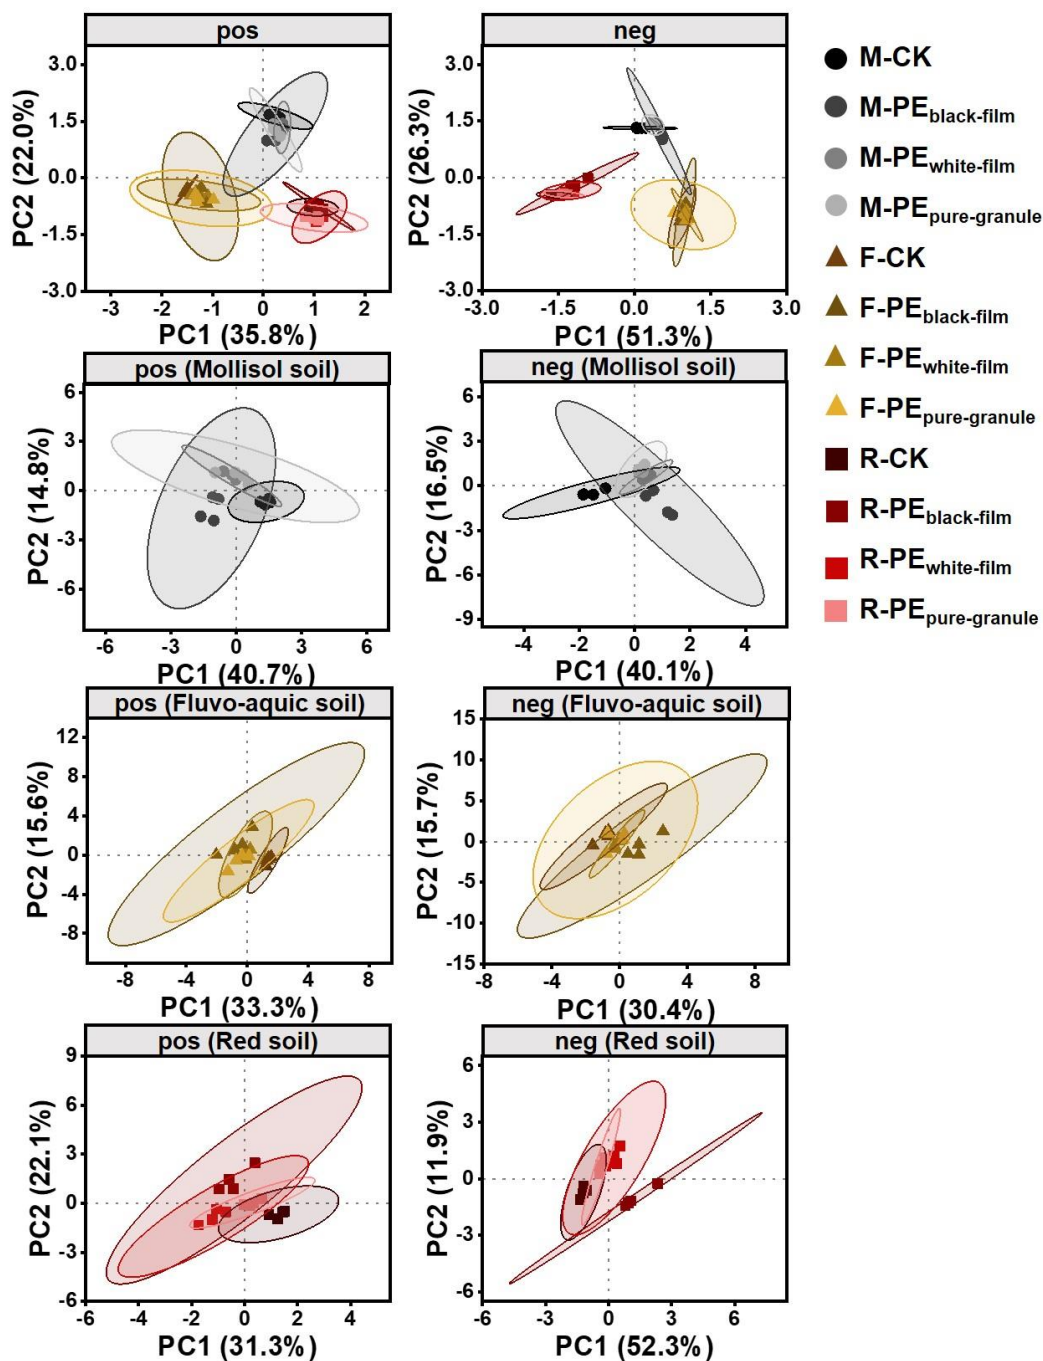

144

145 **Figure S6.** The principal component analysis of water extracted soil metabolites. Pos and neg are  
 146 positive ion and negative ion respectively. CK: Pure soil solution; PE<sub>black-film</sub>: black polyethylene  
 147 film microplastics; PE<sub>white-film</sub>: white polyethylene film microplastics; PE<sub>pure-granule</sub>: pure  
 148 polyethylene microplastic granules.

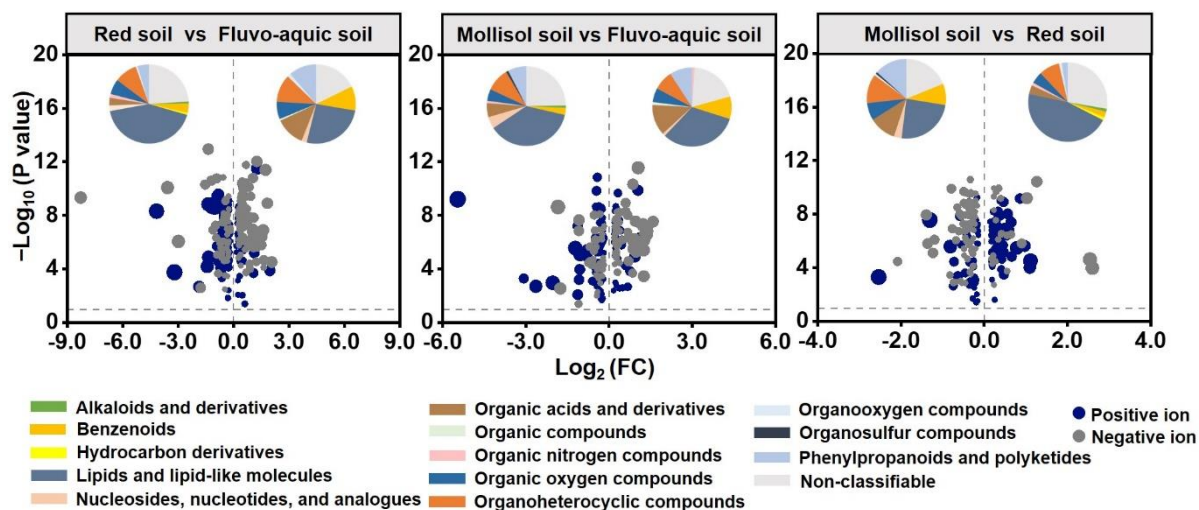

149

150 **Figure S7.** A volcano-plot of water extracted soil metabolites in different soils. For example,  
 151 within the chart of Red soil vs Fluvo-aquic soil,  $FC = \text{Fluvo-aquic soil} / \text{Red soil}$ . The positive  
 152  $\text{Log}_2(FC)$  values mean those metabolites were abundant in Fluvo-aquic soil, while the negative  
 153  $\text{Log}_2(FC)$  values mean those metabolites were abundant in Red soil. The  $-\text{Log}_{10}(p \text{ value})$  higher  
 154 than 1.30 indicates that the significance of all data was in level of  $p \leq 0.05$ .

155

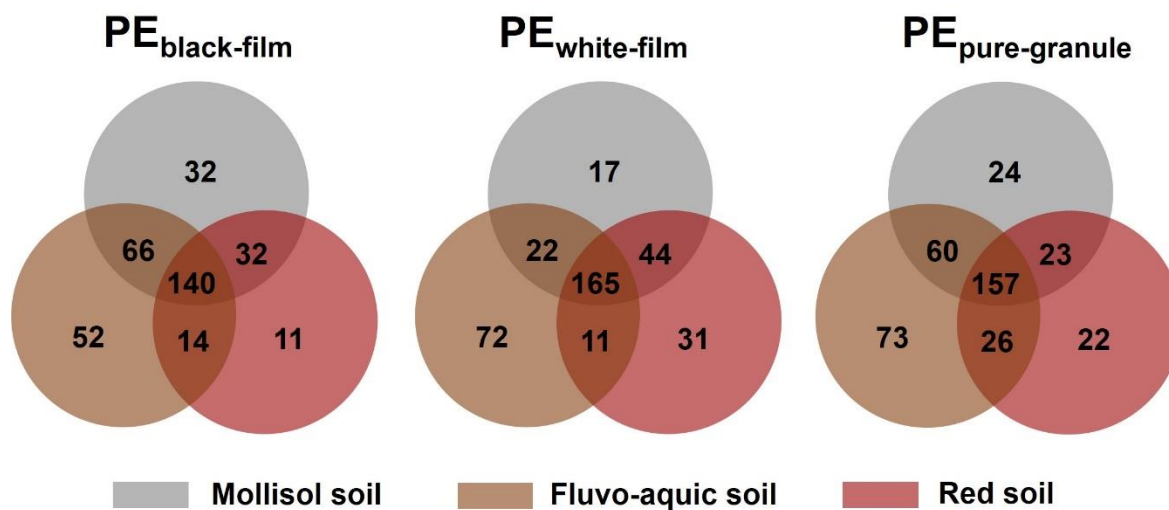

156

157 **Figure S8.** Venn plot of decreased ( $p \leq 0.05$ ) water extracted soil metabolites of different soils  
 158 (mollisol soil, fluvo-aquic soil, red soil) after interaction with black polyethylene film  
 159 microplastics ( $PE_{\text{black-film}}$ ), white polyethylene film microplastics ( $PE_{\text{white-film}}$ ) and pure  
 160 polyethylene microplastic granules ( $PE_{\text{pure-granule}}$ ).

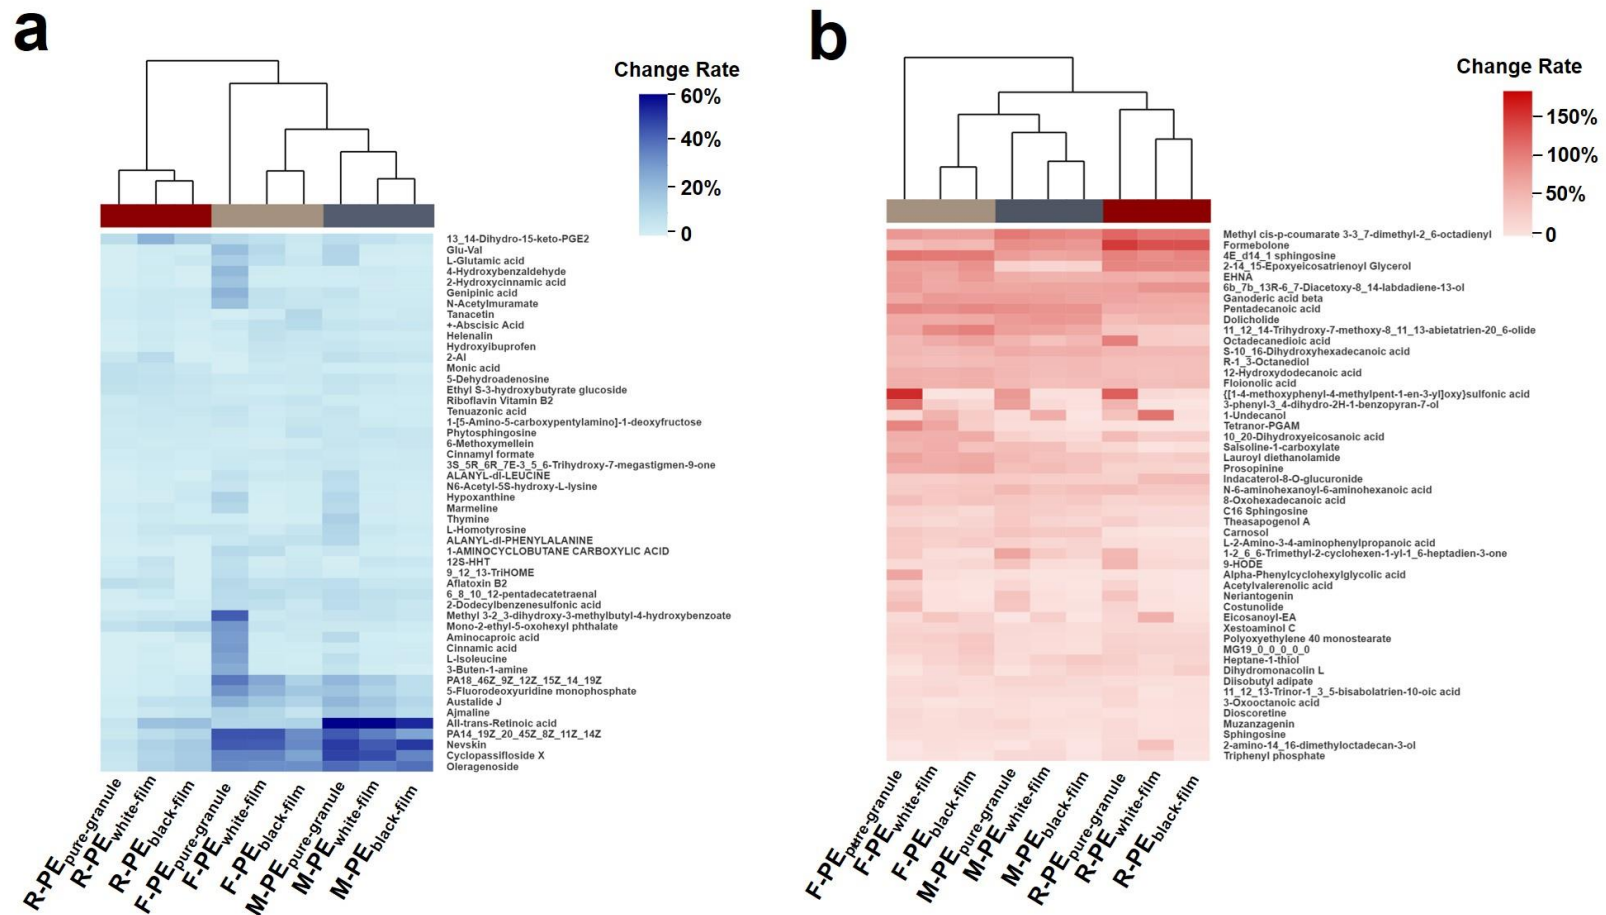

161

162 **Figure S9.** The relative change in decreased (a) and increased (b) water extracted soil metabolites of different soil solutions (mollisol  
163 soil (M), fluvo-aquic soil (F), red soil (R)) after interaction with black polyethylene film microplastics (PE<sub>black-film</sub>), white polyethylene  
164 film microplastics (PE<sub>white-film</sub>) and pure polyethylene microplastic granules (PE<sub>pure-granule</sub>).

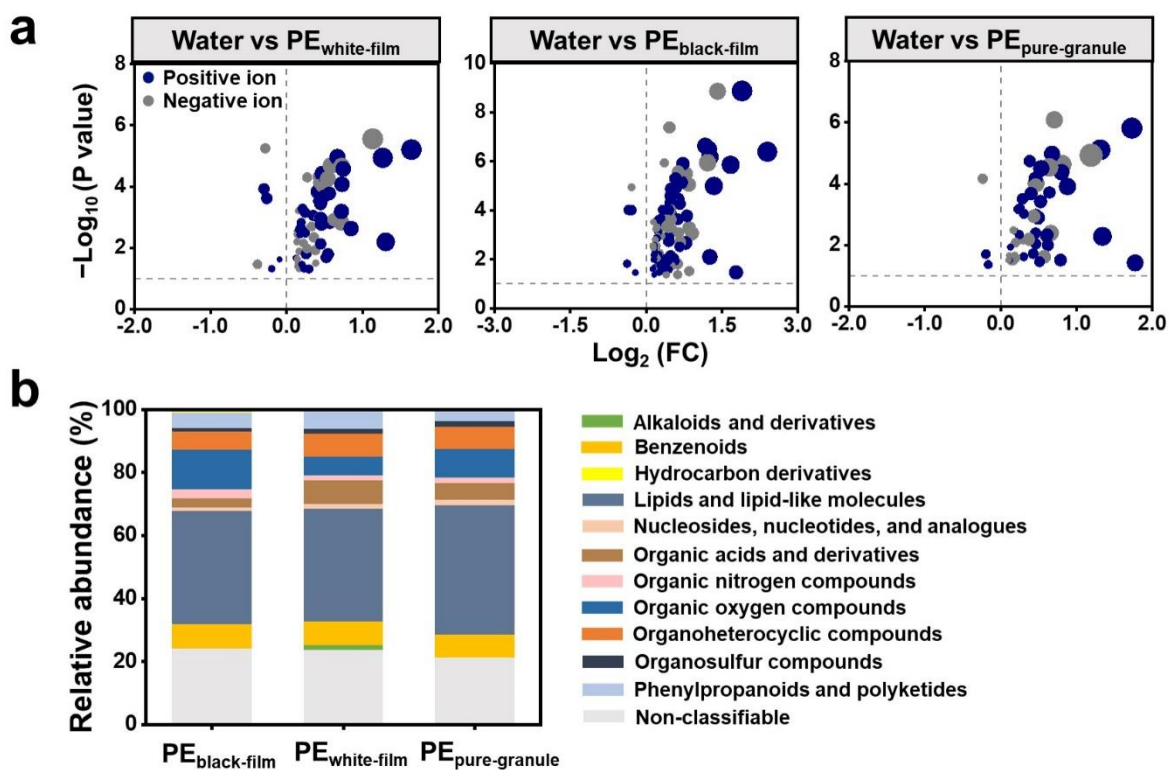

165  
 166 **Figure S10.** The volcano-plot (a) and compounds composition (b) of compounds released by black  
 167 polyethylene film microplastics (PE<sub>black-film</sub>), white polyethylene film microplastics (PE<sub>white-film</sub>)  
 168 and pure polyethylene microplastic granules (PE<sub>pure-granule</sub>) in water. The FC value is quantified as  
 169 the ratio of the concentrations of each metabolite groups in the two systems. For example, within  
 170 the chart of Water vs PE<sub>black-film</sub>,  $FC = PE_{black-film} / Water$ . The positive  $\text{Log}_2(FC)$  values mean those  
 171 metabolites were abundant in PE<sub>black-film</sub>, while the negative  $\text{Log}_2(FC)$  values mean those  
 172 metabolites were abundant in Water. The  $-\text{Log}_{10}(p \text{ value})$  higher than 1.30 indicates that the  
 173 significance of all data was in level of  $p \leq 0.05$ .



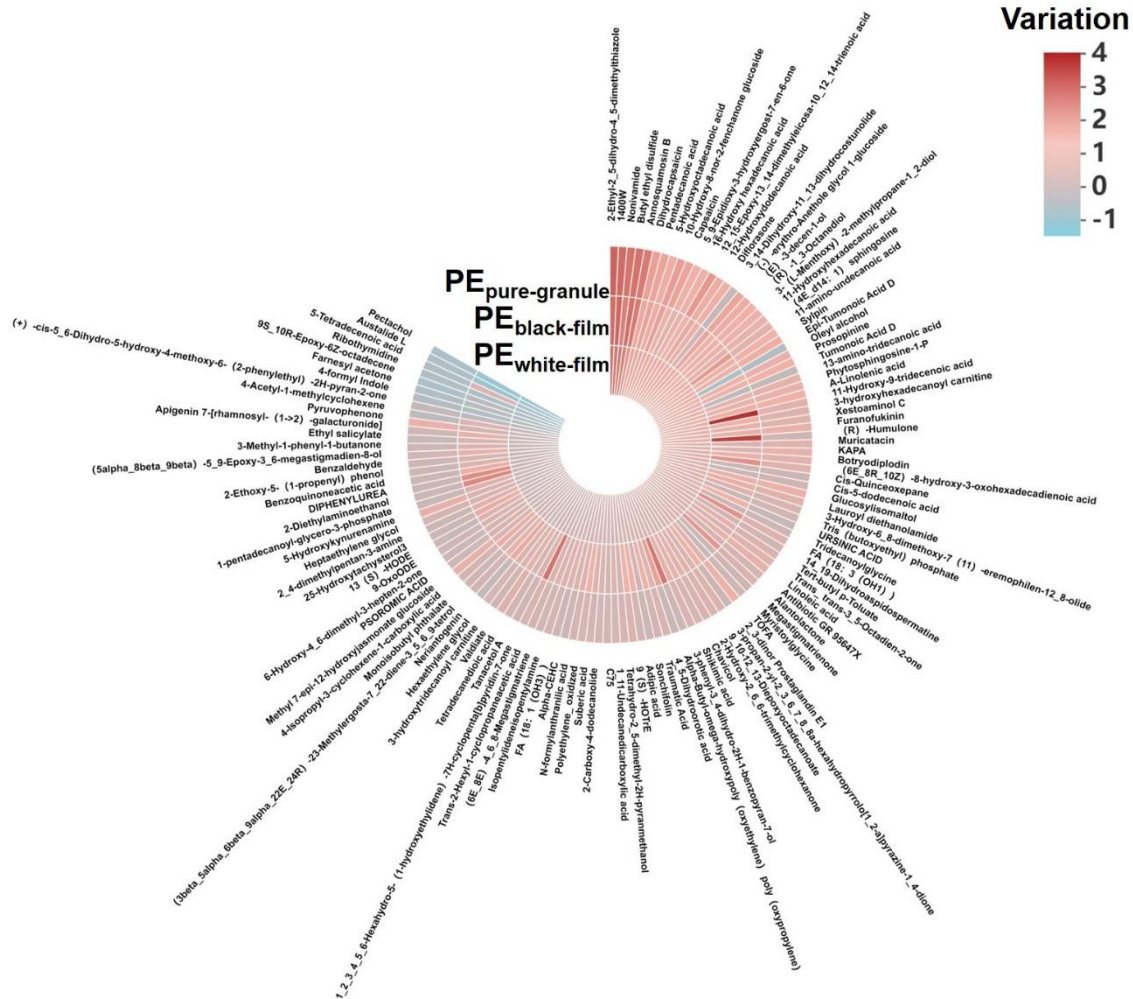

174  
 175 **Figure S11.** The variation of compounds released from black polyethylene film microplastics  
 176 (PE<sub>black-film</sub>), white polyethylene film microplastics (PE<sub>white-film</sub>) and pure polyethylene microplastic  
 177 granules (PE<sub>pure-granule</sub>) in water.

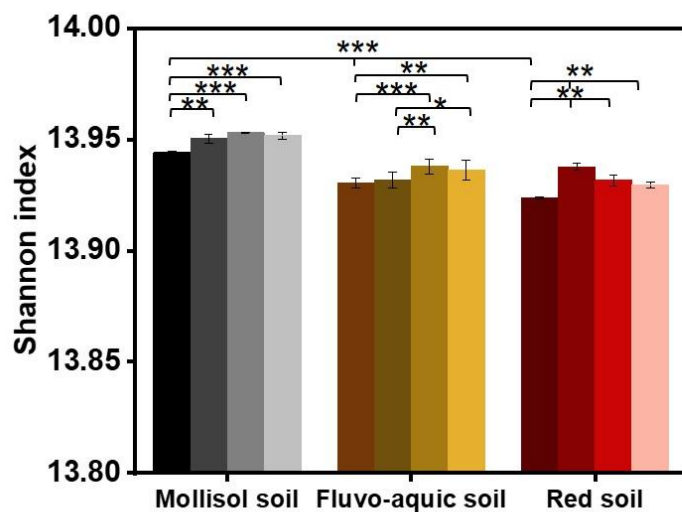

178  
 179 **Figure S12.** The Shannon index of water extracted soil metabolites in different soils before and  
 180 after microplastic exist. The color depth of each soil system was in order of pure soil solution  
 181 control group, black polyethylene film microplastics, white polyethylene film microplastics and  
 182 pure polyethylene microplastic granules treatments. (\*\* $p \leq 0.001$ , \*\* $p \leq 0.01$ , \* $p \leq 0.05$ ).

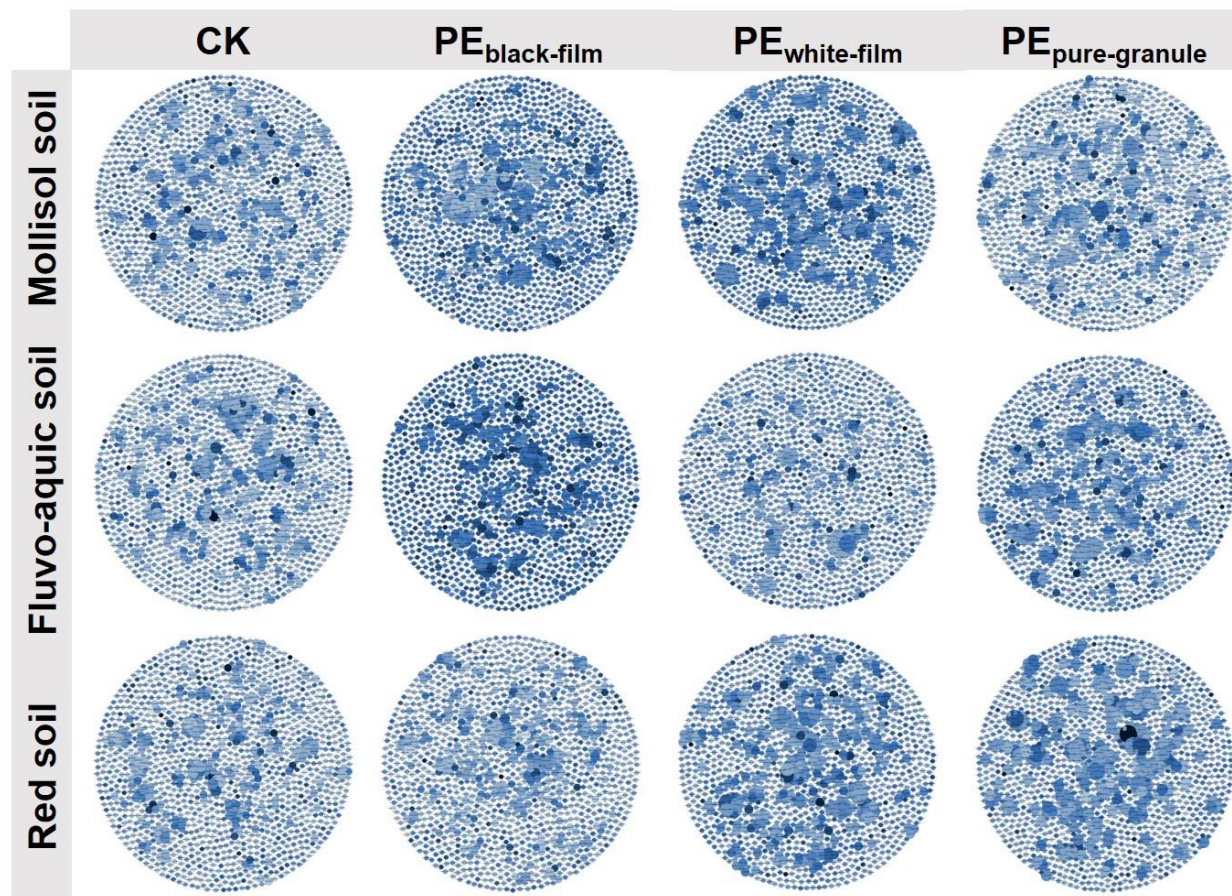

183

184 **Figure S13.** The co-occurrence network of water extracted soil metabolites with or without  
 185 microplastics. The node size indicates the degree of connectivity and the color shade represents  
 186 the abundance of metabolites. CK: solution without microplastics; PE<sub>black-film</sub>: black polyethylene  
 187 film microplastics; PE<sub>white-film</sub>: white polyethylene film microplastics; PE<sub>pure-granule</sub>: pure  
 188 polyethylene microplastic granules.

**Table S4.** The co-occurrence network parameters of water extracted soil metabolites with or without microplastics. CK: solution without microplastics; PE<sub>black-film</sub>: black polyethylene film microplastics, PE<sub>white-film</sub>: white polyethylene film microplastics, PE<sub>pure-granule</sub>: pure polyethylene microplastic granules.

|                  |                            | Node | Eage | Average degree | Modularization | Average clustering coefficient |
|------------------|----------------------------|------|------|----------------|----------------|--------------------------------|
| Mollisol soil    | CK                         | 1277 | 794  | 0.622          | 0.997          | 0.056                          |
|                  | PE <sub>black-film</sub>   | 1270 | 1061 | 0.853          | 0.984          | 0.071                          |
|                  | PE <sub>white-film</sub>   | 1298 | 789  | 0.608          | 0.998          | 0.059                          |
|                  | PE <sub>pure-granule</sub> | 1223 | 795  | 0.650          | 0.997          | 0.064                          |
| Fluvo-aquic soil | CK                         | 1254 | 795  | 0.634          | 0.997          | 0.061                          |
|                  | PE <sub>black-film</sub>   | 1217 | 817  | 0.671          | 0.995          | 0.062                          |
|                  | PE <sub>white-film</sub>   | 1263 | 790  | 0.625          | 0.996          | 0.049                          |
|                  | PE <sub>pure-granule</sub> | 1241 | 795  | 0.641          | 0.997          | 0.064                          |
| Red soil         | CK                         | 1317 | 789  | 0.599          | 0.997          | 0.046                          |
|                  | PE <sub>black-film</sub>   | 1228 | 791  | 0.644          | 0.996          | 0.054                          |
|                  | PE <sub>white-film</sub>   | 1252 | 786  | 0.628          | 0.997          | 0.064                          |
|                  | PE <sub>pure-granule</sub> | 1324 | 790  | 0.597          | 0.998          | 0.038                          |

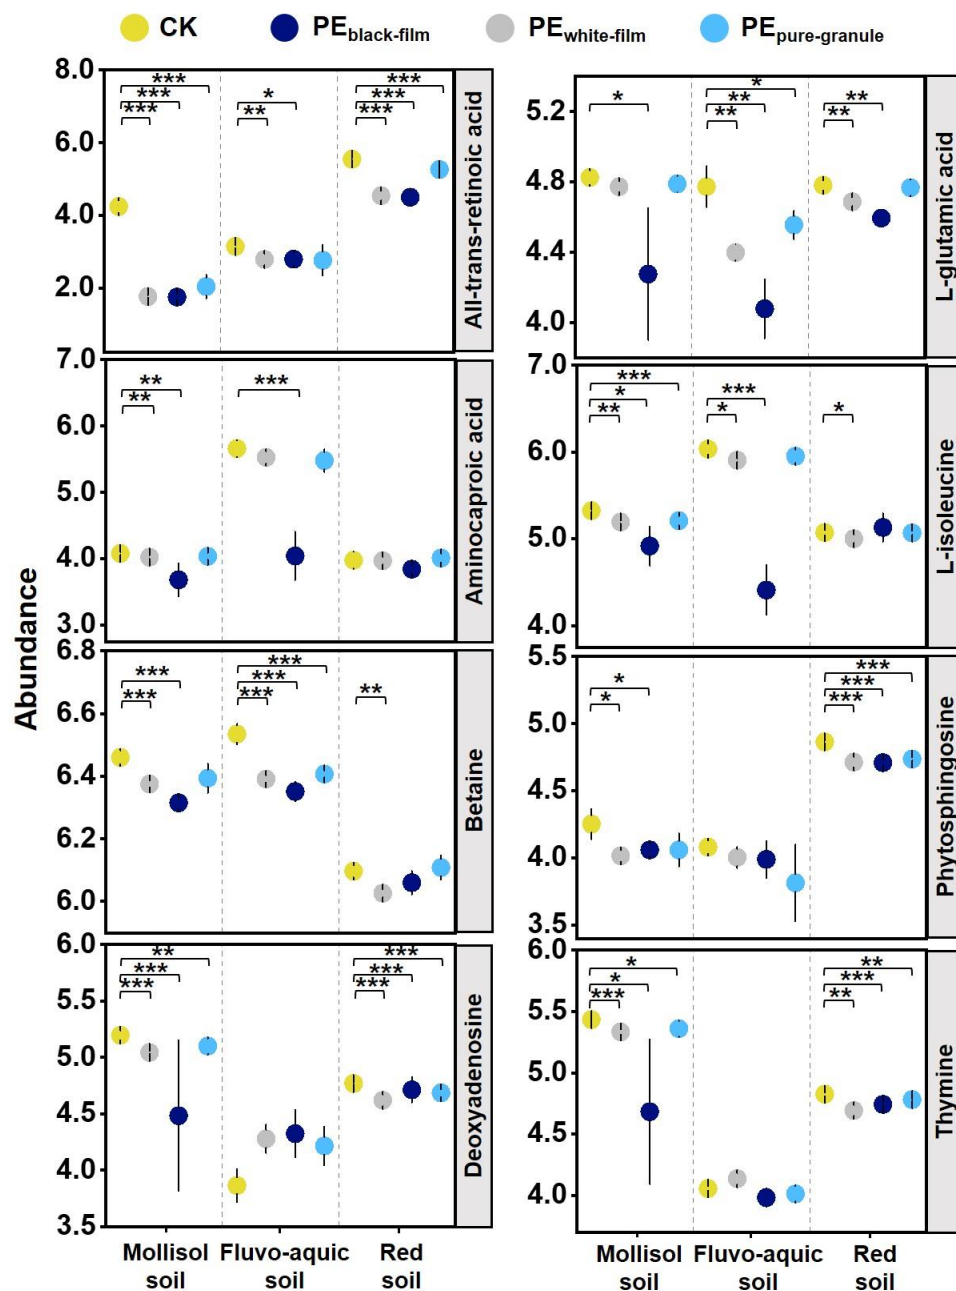

191

192 **Figure S14.** The abundance of all-trans-retinoic acid, thymine, aminocaproic acid, betaine, l-  
 193 isoleucine, l-glutamic acid, phytosphingosine and deoxyadenosin in water extracted soil  
 194 metabolites with or without microplastics. CK: solution without microplastics; PE<sub>black-film</sub>: black  
 195 polyethylene film microplastics; PE<sub>white-film</sub>: white polyethylene film microplastics; PE<sub>pure-granule</sub>:  
 196 pure polyethylene microplastic granules (\*\*\* $p \leq 0.001$ , \*\* $p \leq 0.01$ , \* $p \leq 0.05$ ).

**Table S5.** Kinetics parameters and partition ratios for all-trans-retinoic acid, aminocaproic acid, betaine, deoxyadenosin and thymine sorption on microplastics. PE<sub>black-film</sub>: black polyethylene film microplastics, PE<sub>white-film</sub>: white polyethylene film microplastics, PE<sub>pure-granule</sub>: pure polyethylene microplastic granules.

|                    |       | All-trans-retinoic acid |                      |                     | Aminocaproic acid   |                      |                     | Betaine             |                      |                     | Deoxyadenosin       |                    |                     | Thymine              |                  |                     |
|--------------------|-------|-------------------------|----------------------|---------------------|---------------------|----------------------|---------------------|---------------------|----------------------|---------------------|---------------------|--------------------|---------------------|----------------------|------------------|---------------------|
|                    |       | PE <sub>black-</sub>    | PE <sub>white-</sub> | PE <sub>pure-</sub> | PE <sub>black</sub> | PE <sub>white-</sub> | PE <sub>pure-</sub> | PE <sub>black</sub> | PE <sub>white-</sub> | PE <sub>pure-</sub> | PE <sub>black</sub> | PE <sub>whit</sub> | PE <sub>pure-</sub> | PE <sub>black-</sub> | PE <sub>wh</sub> | PE <sub>pure-</sub> |
|                    |       | film                    | film                 | granule             | -film               | film                 | granule             | -film               | film                 | granule             | -film               | e-film             | granule             | film                 | ite-film         | granule             |
| Pseudo-first-order | $k_l$ | 2.83cd                  | 3.83d                | 2.90cd              | 0.72a               | 2.02bc               | -                   | 0.47a               | 0.86ab               | 2.05bc              | -                   | -                  | 0.64a               | 0.06a                | -                | 0.38a               |
|                    | $Q_e$ | 7.04g                   | 7.81h                | 7.91i               | 0.23a               | 0.60d                | -                   | 0.48c               | 0.37b                | 1.20f               | -                   | -                  | 0.40bc              | 0.40bc               | -                | 0.25a               |
|                    | $R^2$ | 0.99                    | 0.99                 | 0.99                | 0.52                | 0.75                 | -                   | 0.73                | 0.97                 | 0.96                | -                   | -                  | 0.91                | 0.98                 | -                | 0.98                |
| Partition ratio    | $K_p$ | 7.33a                   | 42.11b               | 87.89c              | 0.03a               | 0.08a                | -                   | 0.06a               | 0.05a                | 0.18a               | -                   | -                  | 0.05a               | 0.05a                | -                | 0.03a               |

Note:  $Q_e$  is the sorption amount at sorption equilibrium respectively ( $\text{mg kg}^{-1}$ );  $k_l$  is pseudo-first-order rate constants, and the units is ( $\text{min}^{-1}$ );  $K_p$  is equilibrium partition ratio between all-trans-retinoic acid, aminocaproic acid, betaine, deoxyadenosin and thymine concentration in microplastics and water. The lower case letters in each column represent the significance of the difference at  $p \leq 0.05$ .

**Table S6.** The pH of the different solution. Background solution: LC-MS water with 0.02%  $\text{NaN}_3$  solution;  $\text{PE}_{\text{black-film}}$ : black polyethylene film microplastics,  $\text{PE}_{\text{white-film}}$ : white polyethylene film microplastics,  $\text{PE}_{\text{pure-granule}}$ : pure polyethylene microplastic granules, BSA: Bovine serum albumin.

| Solution                                                           | pH   |
|--------------------------------------------------------------------|------|
| Background solution                                                | 6.92 |
| Background solution + $\text{PE}_{\text{white-film}}$              | 7.14 |
| Background solution + $\text{PE}_{\text{black-film}}$              | 7.41 |
| Background solution + $\text{PE}_{\text{pure-granule}}$            | 7.19 |
| Background solution + BSA coated $\text{PE}_{\text{white-film}}$   | 7.04 |
| Background solution + BSA coated $\text{PE}_{\text{black-film}}$   | 7.28 |
| Background solution + BSA coated $\text{PE}_{\text{pure-granule}}$ | 7.17 |

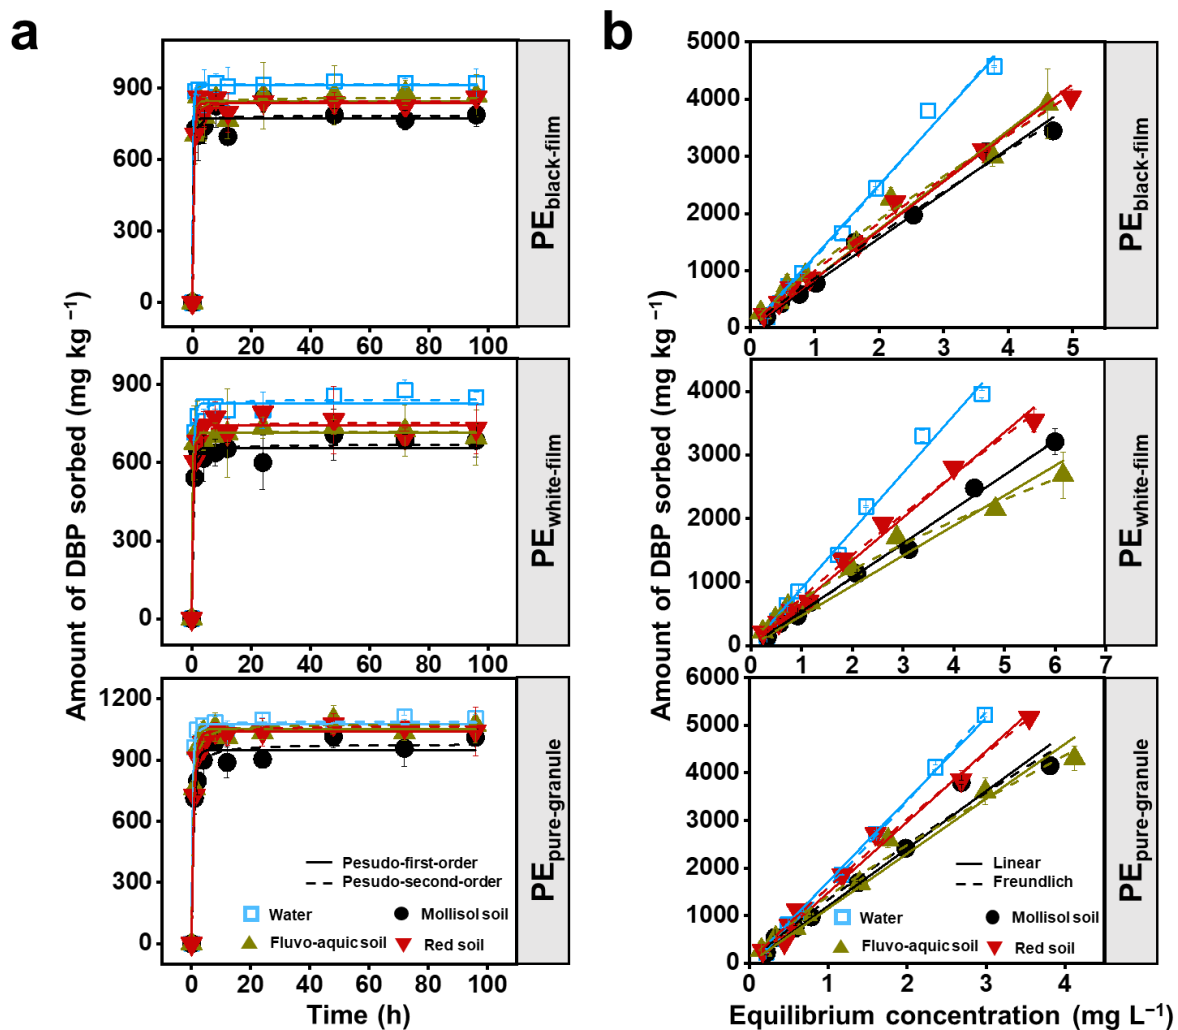

201  
 202 **Figure S15.** Sorption kinetic (a) and isotherms (b) of dibutyl phthalate (DBP) on black  
 203 polyethylene film microplastics (PE<sub>black-film</sub>), white polyethylene film microplastics (PE<sub>white-film</sub>)  
 204 and pure polyethylene microplastic granules (PE<sub>pure-granule</sub>) with water or water extractable soil  
 205 metabolites from different soils as background solutions, respectively.



**Table S7.** Kinetics, isotherms parameters and partition ratios of dibutyl phthalate (DBP) onto microplastics. PE<sub>black-film</sub>: black polyethylene film microplastics, PE<sub>white-film</sub>: white polyethylene film microplastics, PE<sub>pure-granule</sub>: pure polyethylene microplastic granules.

|                            |                  | Pseudo-first-order |          |       | Pseudo-second-order |          |       | Linear    |       | Freundlich |        |       | Partition ratio |
|----------------------------|------------------|--------------------|----------|-------|---------------------|----------|-------|-----------|-------|------------|--------|-------|-----------------|
|                            |                  | $k_1$              | $Q_e$    | $R^2$ | $k_2$               | $Q_e$    | $R^2$ | $K_d$     | $R^2$ | $K_F$      | $1/n$  | $R^2$ | $K_p$           |
| PE <sub>black-film</sub>   | Water            | 3.52e              | 911.41f  | 0.99  | 0.024b              | 917.39f  | 0.99  | 1250.76g  | 0.99  | 1216.35g   | 1.03f  | 0.99  | 1.41de          |
|                            | Mollisol soil    | 2.70cd             | 771.35d  | 0.96  | 0.011a              | 784.45d  | 0.96  | 783.95d   | 0.99  | 865.19cd   | 0.92cd | 0.99  | 1.01bc          |
|                            | Fluvo-aquic soil | 1.86ab             | 845.39e  | 0.97  | 0.0064a             | 860.33e  | 0.97  | 863.21e   | 0.99  | 1061.28f   | 0.88bc | 0.99  | 1.34de          |
|                            | Red soil         | 1.96abc            | 835.71e  | 0.99  | 0.0084a             | 845.43e  | 0.98  | 852.03e   | 0.99  | 995.41ed   | 0.83bc | 0.99  | 1.16cd          |
| PE <sub>white-film</sub>   | Water            | 1.92ab             | 828.06e  | 0.99  | 0.0067a             | 843.32e  | 0.99  | 905.82e   | 0.99  | 904.76de   | 1.00de | 0.99  | 1.04bc          |
|                            | Mollisol soil    | 1.76ab             | 656.39a  | 0.97  | 0.0071a             | 670.04a  | 0.98  | 536.93b   | 0.99  | 530.10a    | 1.01de | 0.99  | 0.67a           |
|                            | Fluvo-aquic soil | 2.95de             | 714.21b  | 0.99  | 0.025b              | 718.64b  | 0.99  | 472.15a   | 0.97  | 726.36b    | 0.72a  | 0.99  | 0.83ab          |
|                            | Red soil         | 1.60ab             | 742.42c  | 0.98  | 0.0060a             | 755.60c  | 0.98  | 671.24c   | 0.99  | 756.20bc   | 0.92cd | 0.99  | 0.86ab          |
| PE <sub>pure-granule</sub> | Water            | 2.21bcd            | 1077.28i | 0.99  | 0.0077a             | 1090.27h | 0.99  | 1717.52i  | 0.99  | 1605.90i   | 1.08f  | 0.99  | 1.98g           |
|                            | Mollisol soil    | 1.22a              | 948.89g  | 0.97  | 0.0026a             | 978.80g  | 0.98  | 1205.45fg | 0.99  | 1341.30h   | 0.89bc | 0.97  | 1.59ef          |
|                            | Fluvo-aquic soil | 1.27a              | 1051.05h | 0.99  | 0.0027a             | 1077.57h | 0.99  | 1151.75f  | 0.98  | 1412.50h   | 0.81b  | 0.98  | 1.73fg          |
|                            | Red soil         | 1.14a              | 1038.16h | 0.99  | 0.0022a             | 1070.66h | 0.99  | 1485.31h  | 0.99  | 1591.79i   | 0.93cd | 0.99  | 1.82fg          |

Note:  $Q_e$  is the sorption amount at sorption equilibrium respectively ( $\text{mg kg}^{-1}$ );  $k_1$  and  $k_2$  are pseudo-first-order and pseudo-second-order rate constants, respectively, and the units are ( $\text{min}^{-1}$ ) and ( $\text{kg mg}^{-1} \text{min}^{-1}$ ), respectively;  $K_d$  and  $K_F$  are the Linear and Freundlich constant ( $\text{L mg}^{-1}$ ), respectively;  $1/n$  is the sorption affinity constant;  $K_p$  is equilibrium partition ratio between DBP concentration in microplastics and background solution. The lower case letters in each column represent the significance of the difference at  $p \leq 0.05$ .

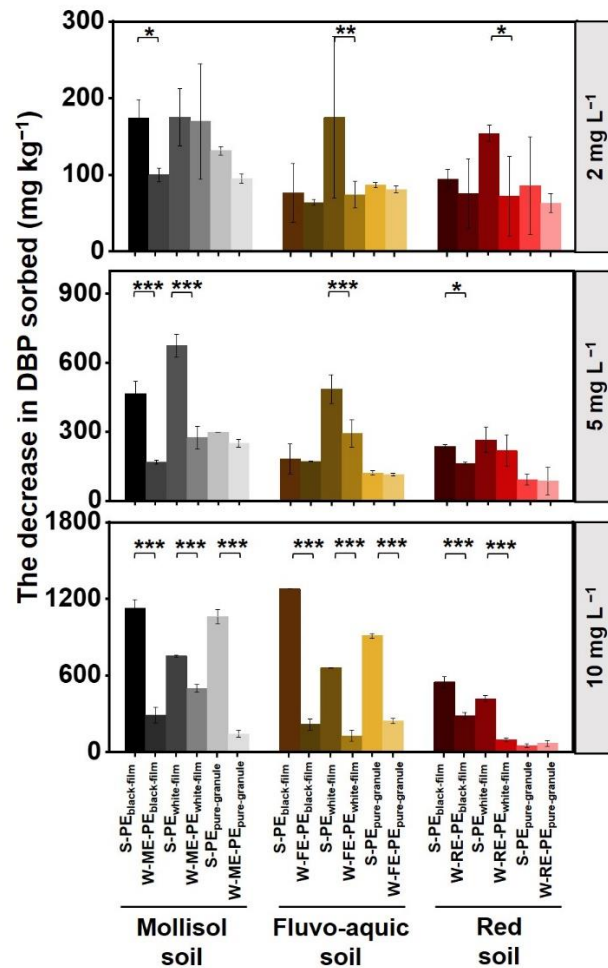

208

209 **Figure S16.** The decreased sorption capacity of dibutyl phthalate (DBP) to microplastics under  
 210 different treatment conditions. PE<sub>black-film</sub>: black polyethylene film microplastics; PE<sub>white-film</sub>: white  
 211 polyethylene film microplastics; PE<sub>pure-granule</sub>: pure polyethylene microplastic granules; : S-  
 212 PE<sub>black-film</sub>, S-PE<sub>white-film</sub>, S-PE<sub>pure-granule</sub>: PE<sub>black-film</sub>, PE<sub>white-film</sub> and PE<sub>pure-granule</sub> in the soil solution;  
 213 W-ME-PE<sub>black-film</sub>, W-ME-PE<sub>white-film</sub>, W-ME-PE<sub>pure-granule</sub>: mollisol soil metabolites formed eco-  
 214 corona on the surface of PE<sub>black-film</sub>, PE<sub>white-film</sub> and PE<sub>pure-granule</sub> in water; W-FE-PE<sub>black-film</sub>, W-FE-  
 215 PE<sub>white-film</sub>, W-FE-PE<sub>pure-granule</sub>: fluvo-aquic soil metabolites formed eco-corona on the surface of  
 216 PE<sub>black-film</sub>, PE<sub>white-film</sub> and PE<sub>pure-granule</sub> in water; W-RE-PE<sub>black-film</sub>, W-RE-PE<sub>white-film</sub>, W-RE-PE<sub>pure-  
 217 granule</sub>: red soil metabolites formed eco-corona on the surface of PE<sub>black-film</sub>, PE<sub>white-film</sub> and PE<sub>pure-  
 218 granule</sub> in water (\*\* $p \leq 0.001$ , \*\* $p \leq 0.01$ , \* $p \leq 0.05$ ).

**Table S8.** The chemical and physical properties of targeted metabolites.

|                         | HMDB Superclass                         | Formula              | CAS ID   | Solubility                   | Structure                                                                             |
|-------------------------|-----------------------------------------|----------------------|----------|------------------------------|---------------------------------------------------------------------------------------|
| All-trans-Retinoic acid | Lipids and lipid-like molecules         | $C_{20}H_{28}O_2$    | 302-79-4 | $< 1 \text{ g L}^{-1}$       | 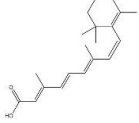   |
| Thymine                 | Organoheterocyclic compounds            | $C_5H_6N_2O_2$       | 65-71-4  | $3.82 \text{ g L}^{-1}$      |    |
| Aminocaproic acid       | Lipids and lipid-like molecules         | $C_6H_{13}NO_2$      | 60-32-2  | $505 \text{ g L}^{-1}$       |    |
| Betaine                 | Organic acids and derivatives           | $C_5H_{11}NO_2$      | 107-43-7 | $611 \text{ g L}^{-1}$       |    |
| L-isoleucine            | Organic acids and derivatives           | $C_6H_{13}NO_2$      | 73-32-5  | $41.2 \text{ g L}^{-1}$      |    |
| L-glutamic acid         | Organic acids and derivatives           | $C_5H_9NO_4$         | 56-86-0  | $7.5 \text{ g L}^{-1}$       |   |
| Phytosphingosine        | Organic nitrogen compounds              | $C_{18}H_{39}NO_3$   | 554-62-1 | -                            |  |
| Deoxyadenosine          | Nucleosides, nucleotides, and analogues | $C_{10}H_{13}N_5O_3$ | 958-09-8 | $\geq 8.37 \text{ g L}^{-1}$ |  |
